# Supplementary material for: Seasonal dynamics and environmental drivers of tissue and mucus microbiomes in the staghorn coral Acropora pulchra
Source: PeerJ. 2024 May 30;12:e17421. doi: 10.7717/peerj.17421 (PMC11144401; doi:10.7717/peerj.17421)
Supplement: Supplemental Information 17 — Water temperatures, monthly and daily precipitation, and concentrations of fecal indicator bacteria (FIB) [file peerj-12-17421-s017.xlsx]

## Sheet: AllTemps
Date	Time	Temp	Site	In.Out
2021-12-28	06:35:00	28.345	In1	In
2021-12-28	06:40:00	28.345	In1	In
2021-12-28	06:45:00	28.345	In1	In
2021-12-28	06:50:00	28.345	In1	In
2021-12-28	06:55:00	28.345	In1	In
2021-12-28	07:00:00	28.345	In1	In
2021-12-28	05:55:00	28.369	In1	In
2021-12-28	06:00:00	28.369	In1	In
2021-12-28	06:05:00	28.369	In1	In
2021-12-28	06:10:00	28.369	In1	In
2021-12-28	06:15:00	28.369	In1	In
2021-12-28	06:20:00	28.369	In1	In
2021-12-28	06:25:00	28.369	In1	In
2021-12-28	06:30:00	28.369	In1	In
2021-12-28	07:05:00	28.369	In1	In
2021-12-28	07:10:00	28.369	In1	In
2021-12-28	07:15:00	28.369	In1	In
2021-12-28	05:35:00	28.394	In1	In
2021-12-28	05:40:00	28.394	In1	In
2021-12-28	05:45:00	28.394	In1	In
2021-12-28	05:50:00	28.394	In1	In
2021-12-28	07:20:00	28.394	In1	In
2021-12-28	07:25:00	28.394	In1	In
2021-12-28	05:25:00	28.419	In1	In
2021-12-28	05:30:00	28.419	In1	In
2021-12-28	07:30:00	28.419	In1	In
2021-12-28	04:55:00	28.444	In1	In
2021-12-28	05:00:00	28.444	In1	In
2021-12-28	05:05:00	28.444	In1	In
2021-12-28	05:10:00	28.444	In1	In
2021-12-28	05:15:00	28.444	In1	In
2021-12-28	05:20:00	28.444	In1	In
2021-12-28	07:35:00	28.444	In1	In
2021-12-28	04:45:00	28.468	In1	In
2021-12-28	04:50:00	28.468	In1	In
2021-12-28	07:40:00	28.468	In1	In
2021-12-28	04:30:00	28.493	In1	In
2021-12-28	04:35:00	28.493	In1	In
2021-12-28	04:40:00	28.493	In1	In
2021-12-28	07:45:00	28.493	In1	In
2021-12-28	07:50:00	28.493	In1	In
2021-12-28	04:15:00	28.518	In1	In
2021-12-28	04:20:00	28.518	In1	In
2021-12-28	04:25:00	28.518	In1	In
2021-12-28	03:40:00	28.543	In1	In
2021-12-28	03:45:00	28.543	In1	In
2021-12-28	03:50:00	28.543	In1	In
2021-12-28	03:55:00	28.543	In1	In
2021-12-28	04:00:00	28.543	In1	In
2021-12-28	04:05:00	28.543	In1	In
2021-12-28	04:10:00	28.543	In1	In
2021-12-28	07:55:00	28.543	In1	In
2021-12-28	03:15:00	28.568	In1	In
2021-12-28	03:20:00	28.568	In1	In
2021-12-28	03:25:00	28.568	In1	In
2021-12-28	03:30:00	28.568	In1	In
2021-12-28	03:35:00	28.568	In1	In
2021-12-28	08:00:00	28.568	In1	In
2021-12-28	02:40:00	28.593	In1	In
2021-12-28	02:45:00	28.593	In1	In
2021-12-28	02:50:00	28.593	In1	In
2021-12-28	02:55:00	28.593	In1	In
2021-12-28	03:00:00	28.593	In1	In
2021-12-28	03:05:00	28.593	In1	In
2021-12-28	03:10:00	28.593	In1	In
2021-12-28	02:10:00	28.617	In1	In
2021-12-28	02:15:00	28.617	In1	In
2021-12-28	02:20:00	28.617	In1	In
2021-12-28	02:25:00	28.617	In1	In
2021-12-28	02:30:00	28.617	In1	In
2021-12-28	02:35:00	28.617	In1	In
2021-12-28	08:05:00	28.617	In1	In
2021-12-28	08:15:00	28.617	In1	In
2021-12-28	01:30:00	28.642	In1	In
2021-12-28	01:35:00	28.642	In1	In
2021-12-28	01:40:00	28.642	In1	In
2021-12-28	01:45:00	28.642	In1	In
2021-12-28	01:50:00	28.642	In1	In
2021-12-28	01:55:00	28.642	In1	In
2021-12-28	02:00:00	28.642	In1	In
2021-12-28	02:05:00	28.642	In1	In
2021-12-28	08:10:00	28.642	In1	In
2021-12-28	00:25:00	28.667	In1	In
2021-12-28	00:30:00	28.667	In1	In
2021-12-28	00:35:00	28.667	In1	In
2021-12-28	00:40:00	28.667	In1	In
2021-12-28	00:45:00	28.667	In1	In
2021-12-28	00:50:00	28.667	In1	In
2021-12-28	00:55:00	28.667	In1	In
2021-12-28	01:00:00	28.667	In1	In
2021-12-28	01:05:00	28.667	In1	In
2021-12-28	01:10:00	28.667	In1	In
2021-12-28	01:15:00	28.667	In1	In
2021-12-28	01:20:00	28.667	In1	In
2021-12-28	01:25:00	28.667	In1	In
2021-12-28	08:20:00	28.667	In1	In
2021-12-28	00:00:00	28.692	In1	In
2021-12-28	00:05:00	28.692	In1	In
2021-12-28	00:10:00	28.692	In1	In
2021-12-28	00:15:00	28.692	In1	In
2021-12-28	00:20:00	28.692	In1	In
2021-12-28	08:25:00	28.692	In1	In
2021-12-28	08:30:00	28.742	In1	In
2021-12-28	08:35:00	28.766	In1	In
2021-12-28	08:40:00	28.791	In1	In
2021-12-28	08:45:00	28.816	In1	In
2021-12-28	08:50:00	28.841	In1	In
2021-12-28	09:00:00	28.841	In1	In
2021-12-28	08:55:00	28.866	In1	In
2021-12-28	09:15:00	28.866	In1	In
2021-12-28	09:05:00	28.891	In1	In
2021-12-28	09:10:00	28.891	In1	In
2021-12-28	09:20:00	28.99	In1	In
2021-12-28	09:25:00	29.04	In1	In
2021-12-28	09:30:00	29.065	In1	In
2021-12-28	10:00:00	29.115	In1	In
2021-12-28	09:35:00	29.14	In1	In
2021-12-28	09:40:00	29.14	In1	In
2021-12-28	09:45:00	29.14	In1	In
2021-12-28	11:20:00	29.14	In1	In
2021-12-28	10:05:00	29.165	In1	In
2021-12-28	11:35:00	29.165	In1	In
2021-12-28	11:50:00	29.165	In1	In
2021-12-28	09:50:00	29.19	In1	In
2021-12-28	09:55:00	29.19	In1	In
2021-12-28	10:15:00	29.19	In1	In
2021-12-28	11:05:00	29.19	In1	In
2021-12-28	11:15:00	29.19	In1	In
2021-12-28	10:25:00	29.215	In1	In
2021-12-28	10:50:00	29.215	In1	In
2021-12-28	11:40:00	29.215	In1	In
2021-12-28	10:20:00	29.24	In1	In
2021-12-28	10:30:00	29.24	In1	In
2021-12-28	10:35:00	29.24	In1	In
2021-12-28	10:40:00	29.24	In1	In
2021-12-28	11:00:00	29.24	In1	In
2021-12-28	11:10:00	29.24	In1	In
2021-12-28	11:25:00	29.24	In1	In
2021-12-28	11:30:00	29.24	In1	In
2021-12-28	11:45:00	29.24	In1	In
2021-12-28	12:25:00	29.24	In1	In
2021-12-28	12:30:00	29.24	In1	In
2021-12-28	10:10:00	29.265	In1	In
2021-12-28	10:45:00	29.265	In1	In
2021-12-28	10:55:00	29.265	In1	In
2021-12-28	11:55:00	29.265	In1	In
2021-12-28	12:00:00	29.29	In1	In
2021-12-28	12:05:00	29.29	In1	In
2021-12-28	12:10:00	29.29	In1	In
2021-12-28	12:20:00	29.29	In1	In
2021-12-28	12:15:00	29.34	In1	In
2021-12-27	06:35:00	28.345	In1	In
2021-12-27	06:40:00	28.345	In1	In
2021-12-27	06:45:00	28.345	In1	In
2021-12-27	06:50:00	28.345	In1	In
2021-12-27	06:55:00	28.345	In1	In
2021-12-27	06:15:00	28.369	In1	In
2021-12-27	06:20:00	28.369	In1	In
2021-12-27	06:25:00	28.369	In1	In
2021-12-27	06:30:00	28.369	In1	In
2021-12-27	07:00:00	28.369	In1	In
2021-12-27	07:05:00	28.369	In1	In
2021-12-27	05:55:00	28.394	In1	In
2021-12-27	06:00:00	28.394	In1	In
2021-12-27	06:05:00	28.394	In1	In
2021-12-27	06:10:00	28.394	In1	In
2021-12-27	07:10:00	28.394	In1	In
2021-12-27	07:15:00	28.394	In1	In
2021-12-27	05:45:00	28.419	In1	In
2021-12-27	05:50:00	28.419	In1	In
2021-12-27	05:30:00	28.444	In1	In
2021-12-27	05:35:00	28.444	In1	In
2021-12-27	05:40:00	28.444	In1	In
2021-12-27	07:20:00	28.444	In1	In
2021-12-27	05:25:00	28.468	In1	In
2021-12-27	07:25:00	28.468	In1	In
2021-12-27	05:10:00	28.493	In1	In
2021-12-27	05:15:00	28.493	In1	In
2021-12-27	05:20:00	28.493	In1	In
2021-12-27	07:30:00	28.493	In1	In
2021-12-27	05:05:00	28.518	In1	In
2021-12-27	04:50:00	28.543	In1	In
2021-12-27	04:55:00	28.543	In1	In
2021-12-27	05:00:00	28.543	In1	In
2021-12-27	07:35:00	28.543	In1	In
2021-12-27	04:10:00	28.568	In1	In
2021-12-27	04:15:00	28.568	In1	In
2021-12-27	04:20:00	28.568	In1	In
2021-12-27	04:25:00	28.568	In1	In
2021-12-27	04:30:00	28.568	In1	In
2021-12-27	04:35:00	28.568	In1	In
2021-12-27	04:40:00	28.568	In1	In
2021-12-27	04:45:00	28.568	In1	In
2021-12-27	07:40:00	28.568	In1	In
2021-12-27	03:55:00	28.593	In1	In
2021-12-27	04:00:00	28.593	In1	In
2021-12-27	04:05:00	28.593	In1	In
2021-12-27	07:45:00	28.593	In1	In
2021-12-27	07:50:00	28.593	In1	In
2021-12-27	03:45:00	28.617	In1	In
2021-12-27	03:50:00	28.617	In1	In
2021-12-27	07:55:00	28.617	In1	In
2021-12-27	08:00:00	28.617	In1	In
2021-12-27	03:25:00	28.642	In1	In
2021-12-27	03:30:00	28.642	In1	In
2021-12-27	03:35:00	28.642	In1	In
2021-12-27	03:40:00	28.642	In1	In
2021-12-27	08:05:00	28.642	In1	In
2021-12-27	08:10:00	28.642	In1	In
2021-12-27	03:00:00	28.667	In1	In
2021-12-27	03:05:00	28.667	In1	In
2021-12-27	03:10:00	28.667	In1	In
2021-12-27	03:15:00	28.667	In1	In
2021-12-27	03:20:00	28.667	In1	In
2021-12-27	08:15:00	28.667	In1	In
2021-12-27	21:30:00	28.667	In1	In
2021-12-27	21:35:00	28.667	In1	In
2021-12-27	01:50:00	28.692	In1	In
2021-12-27	01:55:00	28.692	In1	In
2021-12-27	02:00:00	28.692	In1	In
2021-12-27	02:05:00	28.692	In1	In
2021-12-27	02:10:00	28.692	In1	In
2021-12-27	02:15:00	28.692	In1	In
2021-12-27	02:20:00	28.692	In1	In
2021-12-27	02:25:00	28.692	In1	In
2021-12-27	02:30:00	28.692	In1	In
2021-12-27	02:35:00	28.692	In1	In
2021-12-27	02:40:00	28.692	In1	In
2021-12-27	02:45:00	28.692	In1	In
2021-12-27	02:50:00	28.692	In1	In
2021-12-27	02:55:00	28.692	In1	In
2021-12-27	08:20:00	28.692	In1	In
2021-12-27	20:55:00	28.692	In1	In
2021-12-27	21:00:00	28.692	In1	In
2021-12-27	21:05:00	28.692	In1	In
2021-12-27	21:10:00	28.692	In1	In
2021-12-27	21:15:00	28.692	In1	In
2021-12-27	21:20:00	28.692	In1	In
2021-12-27	21:25:00	28.692	In1	In
2021-12-27	21:40:00	28.692	In1	In
2021-12-27	21:45:00	28.692	In1	In
2021-12-27	21:50:00	28.692	In1	In
2021-12-27	21:55:00	28.692	In1	In
2021-12-27	23:10:00	28.692	In1	In
2021-12-27	23:15:00	28.692	In1	In
2021-12-27	23:20:00	28.692	In1	In
2021-12-27	23:25:00	28.692	In1	In
2021-12-27	23:30:00	28.692	In1	In
2021-12-27	23:35:00	28.692	In1	In
2021-12-27	23:40:00	28.692	In1	In
2021-12-27	23:45:00	28.692	In1	In
2021-12-27	23:50:00	28.692	In1	In
2021-12-27	23:55:00	28.692	In1	In
2021-12-27	01:00:00	28.717	In1	In
2021-12-27	01:05:00	28.717	In1	In
2021-12-27	01:10:00	28.717	In1	In
2021-12-27	01:15:00	28.717	In1	In
2021-12-27	01:20:00	28.717	In1	In
2021-12-27	01:25:00	28.717	In1	In
2021-12-27	01:30:00	28.717	In1	In
2021-12-27	01:35:00	28.717	In1	In
2021-12-27	01:40:00	28.717	In1	In
2021-12-27	01:45:00	28.717	In1	In
2021-12-27	08:25:00	28.717	In1	In
2021-12-27	20:45:00	28.717	In1	In
2021-12-27	20:50:00	28.717	In1	In
2021-12-27	22:00:00	28.717	In1	In
2021-12-27	22:05:00	28.717	In1	In
2021-12-27	22:10:00	28.717	In1	In
2021-12-27	22:15:00	28.717	In1	In
2021-12-27	22:45:00	28.717	In1	In
2021-12-27	22:50:00	28.717	In1	In
2021-12-27	22:55:00	28.717	In1	In
2021-12-27	23:00:00	28.717	In1	In
2021-12-27	23:05:00	28.717	In1	In
2021-12-27	00:35:00	28.742	In1	In
2021-12-27	00:40:00	28.742	In1	In
2021-12-27	00:45:00	28.742	In1	In
2021-12-27	00:50:00	28.742	In1	In
2021-12-27	00:55:00	28.742	In1	In
2021-12-27	08:30:00	28.742	In1	In
2021-12-27	20:35:00	28.742	In1	In
2021-12-27	20:40:00	28.742	In1	In
2021-12-27	22:20:00	28.742	In1	In
2021-12-27	22:25:00	28.742	In1	In
2021-12-27	22:30:00	28.742	In1	In
2021-12-27	22:35:00	28.742	In1	In
2021-12-27	22:40:00	28.742	In1	In
2021-12-27	00:00:00	28.766	In1	In
2021-12-27	00:05:00	28.766	In1	In
2021-12-27	00:10:00	28.766	In1	In
2021-12-27	00:15:00	28.766	In1	In
2021-12-27	00:20:00	28.766	In1	In
2021-12-27	00:25:00	28.766	In1	In
2021-12-27	00:30:00	28.766	In1	In
2021-12-27	19:00:00	28.766	In1	In
2021-12-27	19:05:00	28.766	In1	In
2021-12-27	19:10:00	28.766	In1	In
2021-12-27	19:15:00	28.766	In1	In
2021-12-27	19:20:00	28.766	In1	In
2021-12-27	19:25:00	28.766	In1	In
2021-12-27	19:30:00	28.766	In1	In
2021-12-27	19:35:00	28.766	In1	In
2021-12-27	19:40:00	28.766	In1	In
2021-12-27	19:45:00	28.766	In1	In
2021-12-27	19:50:00	28.766	In1	In
2021-12-27	19:55:00	28.766	In1	In
2021-12-27	20:00:00	28.766	In1	In
2021-12-27	20:05:00	28.766	In1	In
2021-12-27	20:10:00	28.766	In1	In
2021-12-27	20:15:00	28.766	In1	In
2021-12-27	20:20:00	28.766	In1	In
2021-12-27	20:25:00	28.766	In1	In
2021-12-27	20:30:00	28.766	In1	In
2021-12-27	08:35:00	28.791	In1	In
2021-12-27	18:35:00	28.791	In1	In
2021-12-27	18:40:00	28.791	In1	In
2021-12-27	18:45:00	28.791	In1	In
2021-12-27	18:50:00	28.791	In1	In
2021-12-27	18:55:00	28.791	In1	In
2021-12-27	08:40:00	28.816	In1	In
2021-12-27	18:00:00	28.816	In1	In
2021-12-27	18:05:00	28.816	In1	In
2021-12-27	18:10:00	28.816	In1	In
2021-12-27	18:15:00	28.816	In1	In
2021-12-27	18:20:00	28.816	In1	In
2021-12-27	18:25:00	28.816	In1	In
2021-12-27	18:30:00	28.816	In1	In
2021-12-27	17:45:00	28.841	In1	In
2021-12-27	17:50:00	28.841	In1	In
2021-12-27	17:55:00	28.841	In1	In
2021-12-27	08:45:00	28.866	In1	In
2021-12-27	09:00:00	28.866	In1	In
2021-12-27	09:05:00	28.866	In1	In
2021-12-27	17:40:00	28.866	In1	In
2021-12-27	08:50:00	28.891	In1	In
2021-12-27	17:30:00	28.891	In1	In
2021-12-27	17:35:00	28.891	In1	In
2021-12-27	08:55:00	28.916	In1	In
2021-12-27	17:25:00	28.916	In1	In
2021-12-27	17:20:00	28.941	In1	In
2021-12-27	17:15:00	28.965	In1	In
2021-12-27	17:10:00	28.99	In1	In
2021-12-27	09:10:00	29.015	In1	In
2021-12-27	17:05:00	29.015	In1	In
2021-12-27	16:55:00	29.04	In1	In
2021-12-27	17:00:00	29.04	In1	In
2021-12-27	16:50:00	29.065	In1	In
2021-12-27	09:15:00	29.09	In1	In
2021-12-27	16:45:00	29.09	In1	In
2021-12-27	09:20:00	29.14	In1	In
2021-12-27	16:20:00	29.14	In1	In
2021-12-27	16:25:00	29.14	In1	In
2021-12-27	16:30:00	29.14	In1	In
2021-12-27	16:35:00	29.14	In1	In
2021-12-27	16:40:00	29.14	In1	In
2021-12-27	09:25:00	29.19	In1	In
2021-12-27	16:15:00	29.19	In1	In
2021-12-27	09:30:00	29.215	In1	In
2021-12-27	16:05:00	29.215	In1	In
2021-12-27	16:10:00	29.24	In1	In
2021-12-27	16:00:00	29.265	In1	In
2021-12-27	09:35:00	29.29	In1	In
2021-12-27	12:50:00	29.29	In1	In
2021-12-27	15:55:00	29.29	In1	In
2021-12-27	15:35:00	29.315	In1	In
2021-12-27	15:40:00	29.315	In1	In
2021-12-27	15:45:00	29.315	In1	In
2021-12-27	15:50:00	29.315	In1	In
2021-12-27	09:40:00	29.365	In1	In
2021-12-27	12:45:00	29.365	In1	In
2021-12-27	12:55:00	29.365	In1	In
2021-12-27	15:10:00	29.389	In1	In
2021-12-27	15:15:00	29.389	In1	In
2021-12-27	15:20:00	29.389	In1	In
2021-12-27	15:30:00	29.389	In1	In
2021-12-27	09:45:00	29.414	In1	In
2021-12-27	13:05:00	29.414	In1	In
2021-12-27	13:10:00	29.414	In1	In
2021-12-27	14:55:00	29.414	In1	In
2021-12-27	15:00:00	29.414	In1	In
2021-12-27	15:25:00	29.414	In1	In
2021-12-27	09:50:00	29.439	In1	In
2021-12-27	13:00:00	29.439	In1	In
2021-12-27	13:15:00	29.439	In1	In
2021-12-27	13:30:00	29.439	In1	In
2021-12-27	13:55:00	29.439	In1	In
2021-12-27	14:45:00	29.439	In1	In
2021-12-27	14:50:00	29.439	In1	In
2021-12-27	15:05:00	29.439	In1	In
2021-12-27	09:55:00	29.464	In1	In
2021-12-27	13:35:00	29.464	In1	In
2021-12-27	14:00:00	29.464	In1	In
2021-12-27	14:30:00	29.464	In1	In
2021-12-27	14:35:00	29.464	In1	In
2021-12-27	14:40:00	29.464	In1	In
2021-12-27	10:00:00	29.49	In1	In
2021-12-27	13:20:00	29.49	In1	In
2021-12-27	13:25:00	29.49	In1	In
2021-12-27	13:50:00	29.49	In1	In
2021-12-27	14:05:00	29.49	In1	In
2021-12-27	14:10:00	29.49	In1	In
2021-12-27	14:15:00	29.49	In1	In
2021-12-27	14:20:00	29.49	In1	In
2021-12-27	14:25:00	29.49	In1	In
2021-12-27	11:10:00	29.515	In1	In
2021-12-27	12:40:00	29.515	In1	In
2021-12-27	13:40:00	29.515	In1	In
2021-12-27	10:05:00	29.54	In1	In
2021-12-27	10:10:00	29.54	In1	In
2021-12-27	13:45:00	29.54	In1	In
2021-12-27	10:15:00	29.565	In1	In
2021-12-27	11:15:00	29.565	In1	In
2021-12-27	11:25:00	29.565	In1	In
2021-12-27	12:25:00	29.565	In1	In
2021-12-27	12:30:00	29.565	In1	In
2021-12-27	12:35:00	29.565	In1	In
2021-12-27	10:20:00	29.59	In1	In
2021-12-27	10:25:00	29.59	In1	In
2021-12-27	10:55:00	29.59	In1	In
2021-12-27	10:30:00	29.615	In1	In
2021-12-27	10:40:00	29.615	In1	In
2021-12-27	10:45:00	29.615	In1	In
2021-12-27	10:50:00	29.615	In1	In
2021-12-27	11:05:00	29.615	In1	In
2021-12-27	11:20:00	29.615	In1	In
2021-12-27	11:30:00	29.615	In1	In
2021-12-27	12:20:00	29.615	In1	In
2021-12-27	10:35:00	29.64	In1	In
2021-12-27	11:00:00	29.64	In1	In
2021-12-27	11:35:00	29.64	In1	In
2021-12-27	11:50:00	29.64	In1	In
2021-12-27	11:40:00	29.665	In1	In
2021-12-27	11:45:00	29.665	In1	In
2021-12-27	11:55:00	29.665	In1	In
2021-12-27	12:00:00	29.665	In1	In
2021-12-27	12:05:00	29.665	In1	In
2021-12-27	12:10:00	29.665	In1	In
2021-12-27	12:15:00	29.69	In1	In
2021-12-26	06:05:00	28.468	In1	In
2021-12-26	06:10:00	28.468	In1	In
2021-12-26	06:15:00	28.468	In1	In
2021-12-26	06:20:00	28.468	In1	In
2021-12-26	06:25:00	28.468	In1	In
2021-12-26	06:30:00	28.468	In1	In
2021-12-26	06:35:00	28.468	In1	In
2021-12-26	05:30:00	28.493	In1	In
2021-12-26	05:35:00	28.493	In1	In
2021-12-26	05:40:00	28.493	In1	In
2021-12-26	05:45:00	28.493	In1	In
2021-12-26	05:50:00	28.493	In1	In
2021-12-26	05:55:00	28.493	In1	In
2021-12-26	06:00:00	28.493	In1	In
2021-12-26	06:40:00	28.493	In1	In
2021-12-26	06:45:00	28.493	In1	In
2021-12-26	06:50:00	28.493	In1	In
2021-12-26	05:00:00	28.518	In1	In
2021-12-26	05:05:00	28.518	In1	In
2021-12-26	05:10:00	28.518	In1	In
2021-12-26	05:15:00	28.518	In1	In
2021-12-26	05:20:00	28.518	In1	In
2021-12-26	05:25:00	28.518	In1	In
2021-12-26	06:55:00	28.518	In1	In
2021-12-26	07:00:00	28.518	In1	In
2021-12-26	04:45:00	28.543	In1	In
2021-12-26	04:50:00	28.543	In1	In
2021-12-26	04:55:00	28.543	In1	In
2021-12-26	07:05:00	28.543	In1	In
2021-12-26	07:10:00	28.543	In1	In
2021-12-26	04:30:00	28.568	In1	In
2021-12-26	04:35:00	28.568	In1	In
2021-12-26	04:40:00	28.568	In1	In
2021-12-26	07:15:00	28.568	In1	In
2021-12-26	07:20:00	28.568	In1	In
2021-12-26	04:15:00	28.593	In1	In
2021-12-26	04:20:00	28.593	In1	In
2021-12-26	04:25:00	28.593	In1	In
2021-12-26	07:25:00	28.593	In1	In
2021-12-26	07:30:00	28.593	In1	In
2021-12-26	04:00:00	28.617	In1	In
2021-12-26	04:05:00	28.617	In1	In
2021-12-26	04:10:00	28.617	In1	In
2021-12-26	07:35:00	28.617	In1	In
2021-12-26	03:45:00	28.642	In1	In
2021-12-26	03:50:00	28.642	In1	In
2021-12-26	03:55:00	28.642	In1	In
2021-12-26	07:40:00	28.642	In1	In
2021-12-26	03:30:00	28.667	In1	In
2021-12-26	03:35:00	28.667	In1	In
2021-12-26	03:40:00	28.667	In1	In
2021-12-26	02:45:00	28.692	In1	In
2021-12-26	03:10:00	28.692	In1	In
2021-12-26	03:15:00	28.692	In1	In
2021-12-26	03:20:00	28.692	In1	In
2021-12-26	03:25:00	28.692	In1	In
2021-12-26	07:45:00	28.692	In1	In
2021-12-26	07:50:00	28.692	In1	In
2021-12-26	01:55:00	28.717	In1	In
2021-12-26	02:00:00	28.717	In1	In
2021-12-26	02:05:00	28.717	In1	In
2021-12-26	02:10:00	28.717	In1	In
2021-12-26	02:15:00	28.717	In1	In
2021-12-26	02:20:00	28.717	In1	In
2021-12-26	02:25:00	28.717	In1	In
2021-12-26	02:30:00	28.717	In1	In
2021-12-26	02:35:00	28.717	In1	In
2021-12-26	02:40:00	28.717	In1	In
2021-12-26	02:50:00	28.717	In1	In
2021-12-26	02:55:00	28.717	In1	In
2021-12-26	03:00:00	28.717	In1	In
2021-12-26	03:05:00	28.717	In1	In
2021-12-26	07:55:00	28.717	In1	In
2021-12-26	01:30:00	28.742	In1	In
2021-12-26	01:35:00	28.742	In1	In
2021-12-26	01:40:00	28.742	In1	In
2021-12-26	01:45:00	28.742	In1	In
2021-12-26	01:50:00	28.742	In1	In
2021-12-26	00:00:00	28.766	In1	In
2021-12-26	00:05:00	28.766	In1	In
2021-12-26	00:10:00	28.766	In1	In
2021-12-26	00:15:00	28.766	In1	In
2021-12-26	00:20:00	28.766	In1	In
2021-12-26	00:25:00	28.766	In1	In
2021-12-26	00:30:00	28.766	In1	In
2021-12-26	00:35:00	28.766	In1	In
2021-12-26	01:05:00	28.766	In1	In
2021-12-26	01:10:00	28.766	In1	In
2021-12-26	01:15:00	28.766	In1	In
2021-12-26	01:20:00	28.766	In1	In
2021-12-26	01:25:00	28.766	In1	In
2021-12-26	08:00:00	28.766	In1	In
2021-12-26	23:10:00	28.766	In1	In
2021-12-26	23:35:00	28.766	In1	In
2021-12-26	23:40:00	28.766	In1	In
2021-12-26	23:45:00	28.766	In1	In
2021-12-26	23:50:00	28.766	In1	In
2021-12-26	23:55:00	28.766	In1	In
2021-12-26	00:40:00	28.791	In1	In
2021-12-26	00:45:00	28.791	In1	In
2021-12-26	00:50:00	28.791	In1	In
2021-12-26	00:55:00	28.791	In1	In
2021-12-26	01:00:00	28.791	In1	In
2021-12-26	08:05:00	28.791	In1	In
2021-12-26	19:00:00	28.791	In1	In
2021-12-26	19:05:00	28.791	In1	In
2021-12-26	19:10:00	28.791	In1	In
2021-12-26	19:50:00	28.791	In1	In
2021-12-26	20:55:00	28.791	In1	In
2021-12-26	21:00:00	28.791	In1	In
2021-12-26	21:10:00	28.791	In1	In
2021-12-26	21:15:00	28.791	In1	In
2021-12-26	21:20:00	28.791	In1	In
2021-12-26	21:25:00	28.791	In1	In
2021-12-26	21:30:00	28.791	In1	In
2021-12-26	21:35:00	28.791	In1	In
2021-12-26	21:40:00	28.791	In1	In
2021-12-26	21:45:00	28.791	In1	In
2021-12-26	21:55:00	28.791	In1	In
2021-12-26	22:00:00	28.791	In1	In
2021-12-26	22:05:00	28.791	In1	In
2021-12-26	22:20:00	28.791	In1	In
2021-12-26	22:25:00	28.791	In1	In
2021-12-26	22:30:00	28.791	In1	In
2021-12-26	22:35:00	28.791	In1	In
2021-12-26	22:40:00	28.791	In1	In
2021-12-26	22:45:00	28.791	In1	In
2021-12-26	22:50:00	28.791	In1	In
2021-12-26	22:55:00	28.791	In1	In
2021-12-26	23:00:00	28.791	In1	In
2021-12-26	23:05:00	28.791	In1	In
2021-12-26	23:15:00	28.791	In1	In
2021-12-26	23:20:00	28.791	In1	In
2021-12-26	23:25:00	28.791	In1	In
2021-12-26	23:30:00	28.791	In1	In
2021-12-26	08:10:00	28.816	In1	In
2021-12-26	18:25:00	28.816	In1	In
2021-12-26	18:30:00	28.816	In1	In
2021-12-26	18:35:00	28.816	In1	In
2021-12-26	18:40:00	28.816	In1	In
2021-12-26	18:45:00	28.816	In1	In
2021-12-26	18:50:00	28.816	In1	In
2021-12-26	18:55:00	28.816	In1	In
2021-12-26	19:15:00	28.816	In1	In
2021-12-26	19:20:00	28.816	In1	In
2021-12-26	19:25:00	28.816	In1	In
2021-12-26	19:30:00	28.816	In1	In
2021-12-26	19:35:00	28.816	In1	In
2021-12-26	19:40:00	28.816	In1	In
2021-12-26	19:45:00	28.816	In1	In
2021-12-26	19:55:00	28.816	In1	In
2021-12-26	20:00:00	28.816	In1	In
2021-12-26	20:05:00	28.816	In1	In
2021-12-26	20:10:00	28.816	In1	In
2021-12-26	20:15:00	28.816	In1	In
2021-12-26	20:20:00	28.816	In1	In
2021-12-26	20:25:00	28.816	In1	In
2021-12-26	20:30:00	28.816	In1	In
2021-12-26	20:35:00	28.816	In1	In
2021-12-26	20:40:00	28.816	In1	In
2021-12-26	20:45:00	28.816	In1	In
2021-12-26	20:50:00	28.816	In1	In
2021-12-26	21:05:00	28.816	In1	In
2021-12-26	21:50:00	28.816	In1	In
2021-12-26	22:10:00	28.816	In1	In
2021-12-26	22:15:00	28.816	In1	In
2021-12-26	17:55:00	28.841	In1	In
2021-12-26	18:00:00	28.841	In1	In
2021-12-26	18:05:00	28.841	In1	In
2021-12-26	18:10:00	28.841	In1	In
2021-12-26	18:15:00	28.841	In1	In
2021-12-26	18:20:00	28.841	In1	In
2021-12-26	08:15:00	28.866	In1	In
2021-12-26	17:40:00	28.866	In1	In
2021-12-26	17:45:00	28.866	In1	In
2021-12-26	17:50:00	28.866	In1	In
2021-12-26	17:30:00	28.891	In1	In
2021-12-26	17:35:00	28.891	In1	In
2021-12-26	08:20:00	28.916	In1	In
2021-12-26	17:15:00	28.916	In1	In
2021-12-26	17:20:00	28.916	In1	In
2021-12-26	17:25:00	28.916	In1	In
2021-12-26	08:25:00	28.941	In1	In
2021-12-26	17:10:00	28.941	In1	In
2021-12-26	17:00:00	28.965	In1	In
2021-12-26	17:05:00	28.965	In1	In
2021-12-26	08:30:00	28.99	In1	In
2021-12-26	16:50:00	28.99	In1	In
2021-12-26	16:55:00	28.99	In1	In
2021-12-26	16:45:00	29.015	In1	In
2021-12-26	08:35:00	29.04	In1	In
2021-12-26	16:40:00	29.04	In1	In
2021-12-26	08:55:00	29.065	In1	In
2021-12-26	15:00:00	29.065	In1	In
2021-12-26	16:35:00	29.065	In1	In
2021-12-26	08:40:00	29.09	In1	In
2021-12-26	14:50:00	29.09	In1	In
2021-12-26	14:55:00	29.09	In1	In
2021-12-26	16:20:00	29.09	In1	In
2021-12-26	16:30:00	29.09	In1	In
2021-12-26	08:45:00	29.115	In1	In
2021-12-26	08:50:00	29.115	In1	In
2021-12-26	14:45:00	29.115	In1	In
2021-12-26	16:15:00	29.115	In1	In
2021-12-26	16:25:00	29.115	In1	In
2021-12-26	14:40:00	29.14	In1	In
2021-12-26	15:05:00	29.14	In1	In
2021-12-26	16:10:00	29.14	In1	In
2021-12-26	09:00:00	29.165	In1	In
2021-12-26	11:35:00	29.165	In1	In
2021-12-26	14:15:00	29.165	In1	In
2021-12-26	14:25:00	29.165	In1	In
2021-12-26	14:30:00	29.165	In1	In
2021-12-26	15:10:00	29.165	In1	In
2021-12-26	15:15:00	29.165	In1	In
2021-12-26	15:50:00	29.165	In1	In
2021-12-26	16:05:00	29.165	In1	In
2021-12-26	12:00:00	29.19	In1	In
2021-12-26	14:20:00	29.19	In1	In
2021-12-26	14:35:00	29.19	In1	In
2021-12-26	15:20:00	29.19	In1	In
2021-12-26	15:35:00	29.19	In1	In
2021-12-26	15:45:00	29.19	In1	In
2021-12-26	15:55:00	29.19	In1	In
2021-12-26	16:00:00	29.19	In1	In
2021-12-26	10:55:00	29.215	In1	In
2021-12-26	11:25:00	29.215	In1	In
2021-12-26	11:30:00	29.215	In1	In
2021-12-26	11:55:00	29.215	In1	In
2021-12-26	14:10:00	29.215	In1	In
2021-12-26	15:40:00	29.215	In1	In
2021-12-26	09:05:00	29.24	In1	In
2021-12-26	09:10:00	29.24	In1	In
2021-12-26	10:50:00	29.24	In1	In
2021-12-26	11:50:00	29.24	In1	In
2021-12-26	12:15:00	29.24	In1	In
2021-12-26	13:50:00	29.24	In1	In
2021-12-26	14:05:00	29.24	In1	In
2021-12-26	15:25:00	29.24	In1	In
2021-12-26	15:30:00	29.24	In1	In
2021-12-26	11:15:00	29.265	In1	In
2021-12-26	12:05:00	29.265	In1	In
2021-12-26	12:10:00	29.265	In1	In
2021-12-26	13:30:00	29.265	In1	In
2021-12-26	13:35:00	29.265	In1	In
2021-12-26	09:15:00	29.29	In1	In
2021-12-26	10:40:00	29.29	In1	In
2021-12-26	10:45:00	29.29	In1	In
2021-12-26	12:20:00	29.29	In1	In
2021-12-26	12:30:00	29.29	In1	In
2021-12-26	14:00:00	29.29	In1	In
2021-12-26	09:20:00	29.315	In1	In
2021-12-26	09:25:00	29.315	In1	In
2021-12-26	11:00:00	29.315	In1	In
2021-12-26	11:20:00	29.315	In1	In
2021-12-26	11:40:00	29.315	In1	In
2021-12-26	13:10:00	29.315	In1	In
2021-12-26	13:45:00	29.315	In1	In
2021-12-26	13:55:00	29.315	In1	In
2021-12-26	09:30:00	29.34	In1	In
2021-12-26	11:05:00	29.34	In1	In
2021-12-26	11:10:00	29.34	In1	In
2021-12-26	12:25:00	29.34	In1	In
2021-12-26	12:35:00	29.34	In1	In
2021-12-26	12:45:00	29.34	In1	In
2021-12-26	13:25:00	29.34	In1	In
2021-12-26	09:45:00	29.365	In1	In
2021-12-26	10:35:00	29.365	In1	In
2021-12-26	11:45:00	29.365	In1	In
2021-12-26	13:40:00	29.365	In1	In
2021-12-26	09:35:00	29.389	In1	In
2021-12-26	09:40:00	29.389	In1	In
2021-12-26	09:50:00	29.389	In1	In
2021-12-26	09:55:00	29.389	In1	In
2021-12-26	12:40:00	29.389	In1	In
2021-12-26	13:00:00	29.389	In1	In
2021-12-26	13:15:00	29.389	In1	In
2021-12-26	13:20:00	29.389	In1	In
2021-12-26	10:00:00	29.414	In1	In
2021-12-26	12:50:00	29.414	In1	In
2021-12-26	12:55:00	29.414	In1	In
2021-12-26	10:05:00	29.439	In1	In
2021-12-26	10:30:00	29.439	In1	In
2021-12-26	13:05:00	29.439	In1	In
2021-12-26	10:10:00	29.464	In1	In
2021-12-26	10:15:00	29.464	In1	In
2021-12-26	10:20:00	29.49	In1	In
2021-12-26	10:25:00	29.49	In1	In
2021-12-25	05:55:00	28.097	In1	In
2021-12-25	06:00:00	28.097	In1	In
2021-12-25	06:05:00	28.097	In1	In
2021-12-25	06:10:00	28.097	In1	In
2021-12-25	06:15:00	28.097	In1	In
2021-12-25	05:45:00	28.122	In1	In
2021-12-25	05:50:00	28.122	In1	In
2021-12-25	06:20:00	28.122	In1	In
2021-12-25	05:30:00	28.147	In1	In
2021-12-25	05:35:00	28.147	In1	In
2021-12-25	05:40:00	28.147	In1	In
2021-12-25	04:50:00	28.171	In1	In
2021-12-25	04:55:00	28.171	In1	In
2021-12-25	05:00:00	28.171	In1	In
2021-12-25	05:05:00	28.171	In1	In
2021-12-25	05:10:00	28.171	In1	In
2021-12-25	05:15:00	28.171	In1	In
2021-12-25	05:20:00	28.171	In1	In
2021-12-25	05:25:00	28.171	In1	In
2021-12-25	06:25:00	28.171	In1	In
2021-12-25	06:30:00	28.171	In1	In
2021-12-25	06:35:00	28.171	In1	In
2021-12-25	06:40:00	28.171	In1	In
2021-12-25	04:40:00	28.196	In1	In
2021-12-25	04:45:00	28.196	In1	In
2021-12-25	06:45:00	28.196	In1	In
2021-12-25	04:35:00	28.221	In1	In
2021-12-25	06:50:00	28.221	In1	In
2021-12-25	04:25:00	28.245	In1	In
2021-12-25	04:30:00	28.245	In1	In
2021-12-25	04:20:00	28.27	In1	In
2021-12-25	06:55:00	28.27	In1	In
2021-12-25	04:15:00	28.295	In1	In
2021-12-25	07:00:00	28.295	In1	In
2021-12-25	04:10:00	28.32	In1	In
2021-12-25	07:05:00	28.32	In1	In
2021-12-25	04:00:00	28.345	In1	In
2021-12-25	04:05:00	28.345	In1	In
2021-12-25	03:55:00	28.369	In1	In
2021-12-25	07:10:00	28.369	In1	In
2021-12-25	03:50:00	28.394	In1	In
2021-12-25	07:15:00	28.394	In1	In
2021-12-25	07:20:00	28.394	In1	In
2021-12-25	03:45:00	28.419	In1	In
2021-12-25	07:25:00	28.419	In1	In
2021-12-25	03:40:00	28.444	In1	In
2021-12-25	07:30:00	28.444	In1	In
2021-12-25	03:35:00	28.468	In1	In
2021-12-25	07:35:00	28.468	In1	In
2021-12-25	03:30:00	28.493	In1	In
2021-12-25	03:25:00	28.518	In1	In
2021-12-25	07:40:00	28.518	In1	In
2021-12-25	03:15:00	28.543	In1	In
2021-12-25	03:20:00	28.543	In1	In
2021-12-25	07:45:00	28.543	In1	In
2021-12-25	03:05:00	28.568	In1	In
2021-12-25	03:10:00	28.568	In1	In
2021-12-25	02:55:00	28.593	In1	In
2021-12-25	03:00:00	28.593	In1	In
2021-12-25	07:50:00	28.593	In1	In
2021-12-25	07:55:00	28.593	In1	In
2021-12-25	02:35:00	28.617	In1	In
2021-12-25	02:40:00	28.617	In1	In
2021-12-25	02:45:00	28.617	In1	In
2021-12-25	02:50:00	28.617	In1	In
2021-12-25	08:00:00	28.617	In1	In
2021-12-25	08:05:00	28.617	In1	In
2021-12-25	02:20:00	28.642	In1	In
2021-12-25	02:25:00	28.642	In1	In
2021-12-25	02:30:00	28.642	In1	In
2021-12-25	08:10:00	28.642	In1	In
2021-12-25	01:50:00	28.667	In1	In
2021-12-25	01:55:00	28.667	In1	In
2021-12-25	02:00:00	28.667	In1	In
2021-12-25	02:05:00	28.667	In1	In
2021-12-25	02:10:00	28.667	In1	In
2021-12-25	02:15:00	28.667	In1	In
2021-12-25	01:30:00	28.692	In1	In
2021-12-25	01:35:00	28.692	In1	In
2021-12-25	01:40:00	28.692	In1	In
2021-12-25	01:45:00	28.692	In1	In
2021-12-25	08:15:00	28.692	In1	In
2021-12-25	01:10:00	28.717	In1	In
2021-12-25	01:15:00	28.717	In1	In
2021-12-25	01:20:00	28.717	In1	In
2021-12-25	01:25:00	28.717	In1	In
2021-12-25	08:20:00	28.717	In1	In
2021-12-25	00:35:00	28.742	In1	In
2021-12-25	00:40:00	28.742	In1	In
2021-12-25	00:45:00	28.742	In1	In
2021-12-25	00:50:00	28.742	In1	In
2021-12-25	00:55:00	28.742	In1	In
2021-12-25	01:00:00	28.742	In1	In
2021-12-25	01:05:00	28.742	In1	In
2021-12-25	08:25:00	28.742	In1	In
2021-12-25	00:25:00	28.766	In1	In
2021-12-25	00:30:00	28.766	In1	In
2021-12-25	00:00:00	28.791	In1	In
2021-12-25	00:05:00	28.791	In1	In
2021-12-25	00:10:00	28.791	In1	In
2021-12-25	00:15:00	28.791	In1	In
2021-12-25	00:20:00	28.791	In1	In
2021-12-25	08:30:00	28.791	In1	In
2021-12-25	21:05:00	28.791	In1	In
2021-12-25	21:10:00	28.791	In1	In
2021-12-25	21:15:00	28.791	In1	In
2021-12-25	23:15:00	28.791	In1	In
2021-12-25	23:20:00	28.791	In1	In
2021-12-25	23:25:00	28.791	In1	In
2021-12-25	23:30:00	28.791	In1	In
2021-12-25	23:35:00	28.791	In1	In
2021-12-25	23:40:00	28.791	In1	In
2021-12-25	23:45:00	28.791	In1	In
2021-12-25	23:50:00	28.791	In1	In
2021-12-25	23:55:00	28.791	In1	In
2021-12-25	19:20:00	28.816	In1	In
2021-12-25	19:25:00	28.816	In1	In
2021-12-25	19:30:00	28.816	In1	In
2021-12-25	19:35:00	28.816	In1	In
2021-12-25	19:40:00	28.816	In1	In
2021-12-25	19:45:00	28.816	In1	In
2021-12-25	19:50:00	28.816	In1	In
2021-12-25	19:55:00	28.816	In1	In
2021-12-25	20:00:00	28.816	In1	In
2021-12-25	20:05:00	28.816	In1	In
2021-12-25	20:10:00	28.816	In1	In
2021-12-25	20:15:00	28.816	In1	In
2021-12-25	20:20:00	28.816	In1	In
2021-12-25	20:25:00	28.816	In1	In
2021-12-25	20:30:00	28.816	In1	In
2021-12-25	20:35:00	28.816	In1	In
2021-12-25	20:40:00	28.816	In1	In
2021-12-25	20:45:00	28.816	In1	In
2021-12-25	20:50:00	28.816	In1	In
2021-12-25	20:55:00	28.816	In1	In
2021-12-25	21:00:00	28.816	In1	In
2021-12-25	21:20:00	28.816	In1	In
2021-12-25	21:25:00	28.816	In1	In
2021-12-25	21:30:00	28.816	In1	In
2021-12-25	21:35:00	28.816	In1	In
2021-12-25	21:40:00	28.816	In1	In
2021-12-25	21:45:00	28.816	In1	In
2021-12-25	21:50:00	28.816	In1	In
2021-12-25	21:55:00	28.816	In1	In
2021-12-25	22:00:00	28.816	In1	In
2021-12-25	22:05:00	28.816	In1	In
2021-12-25	22:10:00	28.816	In1	In
2021-12-25	22:15:00	28.816	In1	In
2021-12-25	22:20:00	28.816	In1	In
2021-12-25	22:25:00	28.816	In1	In
2021-12-25	22:30:00	28.816	In1	In
2021-12-25	22:35:00	28.816	In1	In
2021-12-25	22:40:00	28.816	In1	In
2021-12-25	22:45:00	28.816	In1	In
2021-12-25	22:50:00	28.816	In1	In
2021-12-25	22:55:00	28.816	In1	In
2021-12-25	23:00:00	28.816	In1	In
2021-12-25	23:05:00	28.816	In1	In
2021-12-25	23:10:00	28.816	In1	In
2021-12-25	08:35:00	28.841	In1	In
2021-12-25	17:50:00	28.841	In1	In
2021-12-25	17:55:00	28.841	In1	In
2021-12-25	18:00:00	28.841	In1	In
2021-12-25	18:05:00	28.841	In1	In
2021-12-25	18:10:00	28.841	In1	In
2021-12-25	18:15:00	28.841	In1	In
2021-12-25	18:20:00	28.841	In1	In
2021-12-25	18:25:00	28.841	In1	In
2021-12-25	18:30:00	28.841	In1	In
2021-12-25	18:35:00	28.841	In1	In
2021-12-25	18:40:00	28.841	In1	In
2021-12-25	18:45:00	28.841	In1	In
2021-12-25	18:50:00	28.841	In1	In
2021-12-25	18:55:00	28.841	In1	In
2021-12-25	19:00:00	28.841	In1	In
2021-12-25	19:05:00	28.841	In1	In
2021-12-25	19:10:00	28.841	In1	In
2021-12-25	19:15:00	28.841	In1	In
2021-12-25	08:40:00	28.866	In1	In
2021-12-25	08:45:00	28.866	In1	In
2021-12-25	17:35:00	28.866	In1	In
2021-12-25	17:40:00	28.866	In1	In
2021-12-25	17:45:00	28.866	In1	In
2021-12-25	17:25:00	28.891	In1	In
2021-12-25	17:30:00	28.891	In1	In
2021-12-25	08:50:00	28.916	In1	In
2021-12-25	17:15:00	28.916	In1	In
2021-12-25	17:20:00	28.916	In1	In
2021-12-25	17:00:00	28.941	In1	In
2021-12-25	17:05:00	28.941	In1	In
2021-12-25	17:10:00	28.941	In1	In
2021-12-25	08:55:00	28.965	In1	In
2021-12-25	16:55:00	28.965	In1	In
2021-12-25	16:45:00	28.99	In1	In
2021-12-25	16:50:00	28.99	In1	In
2021-12-25	09:00:00	29.015	In1	In
2021-12-25	09:25:00	29.015	In1	In
2021-12-25	16:40:00	29.015	In1	In
2021-12-25	09:10:00	29.04	In1	In
2021-12-25	09:20:00	29.04	In1	In
2021-12-25	09:30:00	29.04	In1	In
2021-12-25	15:40:00	29.04	In1	In
2021-12-25	16:05:00	29.04	In1	In
2021-12-25	16:10:00	29.04	In1	In
2021-12-25	16:15:00	29.04	In1	In
2021-12-25	16:25:00	29.04	In1	In
2021-12-25	16:30:00	29.04	In1	In
2021-12-25	16:35:00	29.04	In1	In
2021-12-25	09:05:00	29.065	In1	In
2021-12-25	15:25:00	29.065	In1	In
2021-12-25	15:35:00	29.065	In1	In
2021-12-25	15:50:00	29.065	In1	In
2021-12-25	16:00:00	29.065	In1	In
2021-12-25	16:20:00	29.065	In1	In
2021-12-25	15:15:00	29.09	In1	In
2021-12-25	15:20:00	29.09	In1	In
2021-12-25	15:30:00	29.09	In1	In
2021-12-25	15:45:00	29.09	In1	In
2021-12-25	15:55:00	29.09	In1	In
2021-12-25	09:15:00	29.115	In1	In
2021-12-25	09:35:00	29.115	In1	In
2021-12-25	13:55:00	29.14	In1	In
2021-12-25	14:00:00	29.14	In1	In
2021-12-25	15:10:00	29.14	In1	In
2021-12-25	13:50:00	29.165	In1	In
2021-12-25	14:05:00	29.165	In1	In
2021-12-25	14:10:00	29.165	In1	In
2021-12-25	14:15:00	29.165	In1	In
2021-12-25	14:35:00	29.165	In1	In
2021-12-25	15:05:00	29.165	In1	In
2021-12-25	09:40:00	29.19	In1	In
2021-12-25	11:00:00	29.19	In1	In
2021-12-25	11:05:00	29.19	In1	In
2021-12-25	11:25:00	29.19	In1	In
2021-12-25	11:30:00	29.19	In1	In
2021-12-25	14:20:00	29.19	In1	In
2021-12-25	14:30:00	29.19	In1	In
2021-12-25	14:55:00	29.19	In1	In
2021-12-25	15:00:00	29.19	In1	In
2021-12-25	10:55:00	29.215	In1	In
2021-12-25	13:40:00	29.215	In1	In
2021-12-25	13:45:00	29.215	In1	In
2021-12-25	14:25:00	29.215	In1	In
2021-12-25	14:40:00	29.215	In1	In
2021-12-25	14:50:00	29.215	In1	In
2021-12-25	09:45:00	29.24	In1	In
2021-12-25	14:45:00	29.24	In1	In
2021-12-25	09:50:00	29.265	In1	In
2021-12-25	10:15:00	29.265	In1	In
2021-12-25	10:20:00	29.265	In1	In
2021-12-25	11:10:00	29.265	In1	In
2021-12-25	11:20:00	29.265	In1	In
2021-12-25	11:45:00	29.265	In1	In
2021-12-25	12:50:00	29.265	In1	In
2021-12-25	13:30:00	29.265	In1	In
2021-12-25	13:35:00	29.265	In1	In
2021-12-25	09:55:00	29.29	In1	In
2021-12-25	10:30:00	29.29	In1	In
2021-12-25	10:35:00	29.29	In1	In
2021-12-25	10:50:00	29.29	In1	In
2021-12-25	11:35:00	29.29	In1	In
2021-12-25	12:40:00	29.29	In1	In
2021-12-25	12:45:00	29.29	In1	In
2021-12-25	13:25:00	29.29	In1	In
2021-12-25	10:00:00	29.315	In1	In
2021-12-25	10:10:00	29.315	In1	In
2021-12-25	11:15:00	29.315	In1	In
2021-12-25	11:40:00	29.315	In1	In
2021-12-25	11:50:00	29.315	In1	In
2021-12-25	11:55:00	29.315	In1	In
2021-12-25	13:20:00	29.315	In1	In
2021-12-25	10:05:00	29.34	In1	In
2021-12-25	10:25:00	29.34	In1	In
2021-12-25	10:40:00	29.34	In1	In
2021-12-25	12:30:00	29.34	In1	In
2021-12-25	12:35:00	29.34	In1	In
2021-12-25	12:55:00	29.34	In1	In
2021-12-25	13:05:00	29.34	In1	In
2021-12-25	13:00:00	29.365	In1	In
2021-12-25	10:45:00	29.389	In1	In
2021-12-25	12:00:00	29.389	In1	In
2021-12-25	12:05:00	29.389	In1	In
2021-12-25	12:10:00	29.389	In1	In
2021-12-25	12:25:00	29.389	In1	In
2021-12-25	13:10:00	29.389	In1	In
2021-12-25	12:20:00	29.414	In1	In
2021-12-25	13:15:00	29.414	In1	In
2021-12-25	12:15:00	29.464	In1	In
2021-12-24	05:30:00	28.147	In1	In
2021-12-24	05:35:00	28.147	In1	In
2021-12-24	05:40:00	28.147	In1	In
2021-12-24	05:45:00	28.147	In1	In
2021-12-24	05:50:00	28.147	In1	In
2021-12-24	05:20:00	28.171	In1	In
2021-12-24	05:25:00	28.171	In1	In
2021-12-24	05:55:00	28.171	In1	In
2021-12-24	06:00:00	28.171	In1	In
2021-12-24	05:15:00	28.196	In1	In
2021-12-24	06:05:00	28.196	In1	In
2021-12-24	05:05:00	28.221	In1	In
2021-12-24	05:10:00	28.221	In1	In
2021-12-24	06:10:00	28.221	In1	In
2021-12-24	05:00:00	28.245	In1	In
2021-12-24	06:15:00	28.245	In1	In
2021-12-24	04:50:00	28.27	In1	In
2021-12-24	04:55:00	28.27	In1	In
2021-12-24	06:20:00	28.27	In1	In
2021-12-24	04:35:00	28.295	In1	In
2021-12-24	04:40:00	28.295	In1	In
2021-12-24	04:45:00	28.295	In1	In
2021-12-24	06:25:00	28.295	In1	In
2021-12-24	04:30:00	28.32	In1	In
2021-12-24	06:30:00	28.32	In1	In
2021-12-24	04:15:00	28.345	In1	In
2021-12-24	04:20:00	28.345	In1	In
2021-12-24	04:25:00	28.345	In1	In
2021-12-24	04:05:00	28.369	In1	In
2021-12-24	04:10:00	28.369	In1	In
2021-12-24	06:35:00	28.369	In1	In
2021-12-24	03:55:00	28.394	In1	In
2021-12-24	04:00:00	28.394	In1	In
2021-12-24	03:50:00	28.419	In1	In
2021-12-24	06:40:00	28.419	In1	In
2021-12-24	03:40:00	28.444	In1	In
2021-12-24	03:45:00	28.444	In1	In
2021-12-24	06:45:00	28.444	In1	In
2021-12-24	03:35:00	28.468	In1	In
2021-12-24	03:25:00	28.493	In1	In
2021-12-24	03:30:00	28.493	In1	In
2021-12-24	06:50:00	28.493	In1	In
2021-12-24	03:15:00	28.518	In1	In
2021-12-24	03:20:00	28.518	In1	In
2021-12-24	06:55:00	28.518	In1	In
2021-12-24	03:05:00	28.543	In1	In
2021-12-24	03:10:00	28.543	In1	In
2021-12-24	02:55:00	28.568	In1	In
2021-12-24	03:00:00	28.568	In1	In
2021-12-24	07:00:00	28.568	In1	In
2021-12-24	02:45:00	28.593	In1	In
2021-12-24	02:50:00	28.593	In1	In
2021-12-24	07:05:00	28.593	In1	In
2021-12-24	02:35:00	28.617	In1	In
2021-12-24	02:40:00	28.617	In1	In
2021-12-24	07:10:00	28.617	In1	In
2021-12-24	02:25:00	28.642	In1	In
2021-12-24	02:30:00	28.642	In1	In
2021-12-24	07:15:00	28.642	In1	In
2021-12-24	07:20:00	28.642	In1	In
2021-12-24	07:25:00	28.642	In1	In
2021-12-24	07:30:00	28.642	In1	In
2021-12-24	02:20:00	28.667	In1	In
2021-12-24	07:35:00	28.667	In1	In
2021-12-24	07:40:00	28.667	In1	In
2021-12-24	02:10:00	28.692	In1	In
2021-12-24	02:15:00	28.692	In1	In
2021-12-24	07:45:00	28.692	In1	In
2021-12-24	07:50:00	28.692	In1	In
2021-12-24	07:55:00	28.692	In1	In
2021-12-24	02:00:00	28.717	In1	In
2021-12-24	02:05:00	28.717	In1	In
2021-12-24	01:45:00	28.742	In1	In
2021-12-24	01:50:00	28.742	In1	In
2021-12-24	01:55:00	28.742	In1	In
2021-12-24	08:00:00	28.742	In1	In
2021-12-24	01:25:00	28.766	In1	In
2021-12-24	01:30:00	28.766	In1	In
2021-12-24	01:35:00	28.766	In1	In
2021-12-24	01:40:00	28.766	In1	In
2021-12-24	08:05:00	28.766	In1	In
2021-12-24	21:10:00	28.766	In1	In
2021-12-24	21:15:00	28.766	In1	In
2021-12-24	21:20:00	28.766	In1	In
2021-12-24	21:25:00	28.766	In1	In
2021-12-24	21:30:00	28.766	In1	In
2021-12-24	21:35:00	28.766	In1	In
2021-12-24	21:40:00	28.766	In1	In
2021-12-24	21:45:00	28.766	In1	In
2021-12-24	21:50:00	28.766	In1	In
2021-12-24	21:55:00	28.766	In1	In
2021-12-24	22:25:00	28.766	In1	In
2021-12-24	22:30:00	28.766	In1	In
2021-12-24	01:00:00	28.791	In1	In
2021-12-24	01:05:00	28.791	In1	In
2021-12-24	01:10:00	28.791	In1	In
2021-12-24	01:15:00	28.791	In1	In
2021-12-24	01:20:00	28.791	In1	In
2021-12-24	08:20:00	28.791	In1	In
2021-12-24	18:45:00	28.791	In1	In
2021-12-24	18:50:00	28.791	In1	In
2021-12-24	18:55:00	28.791	In1	In
2021-12-24	19:00:00	28.791	In1	In
2021-12-24	19:05:00	28.791	In1	In
2021-12-24	19:10:00	28.791	In1	In
2021-12-24	20:20:00	28.791	In1	In
2021-12-24	20:25:00	28.791	In1	In
2021-12-24	20:30:00	28.791	In1	In
2021-12-24	20:35:00	28.791	In1	In
2021-12-24	20:40:00	28.791	In1	In
2021-12-24	20:45:00	28.791	In1	In
2021-12-24	20:50:00	28.791	In1	In
2021-12-24	20:55:00	28.791	In1	In
2021-12-24	21:00:00	28.791	In1	In
2021-12-24	21:05:00	28.791	In1	In
2021-12-24	22:00:00	28.791	In1	In
2021-12-24	22:05:00	28.791	In1	In
2021-12-24	22:10:00	28.791	In1	In
2021-12-24	22:15:00	28.791	In1	In
2021-12-24	22:20:00	28.791	In1	In
2021-12-24	22:35:00	28.791	In1	In
2021-12-24	22:40:00	28.791	In1	In
2021-12-24	22:45:00	28.791	In1	In
2021-12-24	22:50:00	28.791	In1	In
2021-12-24	22:55:00	28.791	In1	In
2021-12-24	23:00:00	28.791	In1	In
2021-12-24	23:05:00	28.791	In1	In
2021-12-24	23:10:00	28.791	In1	In
2021-12-24	23:15:00	28.791	In1	In
2021-12-24	23:20:00	28.791	In1	In
2021-12-24	23:25:00	28.791	In1	In
2021-12-24	23:30:00	28.791	In1	In
2021-12-24	23:40:00	28.791	In1	In
2021-12-24	23:45:00	28.791	In1	In
2021-12-24	23:50:00	28.791	In1	In
2021-12-24	23:55:00	28.791	In1	In
2021-12-24	00:40:00	28.816	In1	In
2021-12-24	00:45:00	28.816	In1	In
2021-12-24	00:50:00	28.816	In1	In
2021-12-24	00:55:00	28.816	In1	In
2021-12-24	08:10:00	28.816	In1	In
2021-12-24	08:15:00	28.816	In1	In
2021-12-24	08:25:00	28.816	In1	In
2021-12-24	09:25:00	28.816	In1	In
2021-12-24	18:20:00	28.816	In1	In
2021-12-24	18:25:00	28.816	In1	In
2021-12-24	18:30:00	28.816	In1	In
2021-12-24	18:35:00	28.816	In1	In
2021-12-24	18:40:00	28.816	In1	In
2021-12-24	19:15:00	28.816	In1	In
2021-12-24	19:20:00	28.816	In1	In
2021-12-24	19:25:00	28.816	In1	In
2021-12-24	19:30:00	28.816	In1	In
2021-12-24	19:35:00	28.816	In1	In
2021-12-24	19:40:00	28.816	In1	In
2021-12-24	19:45:00	28.816	In1	In
2021-12-24	19:50:00	28.816	In1	In
2021-12-24	19:55:00	28.816	In1	In
2021-12-24	20:00:00	28.816	In1	In
2021-12-24	20:05:00	28.816	In1	In
2021-12-24	20:10:00	28.816	In1	In
2021-12-24	20:15:00	28.816	In1	In
2021-12-24	23:35:00	28.816	In1	In
2021-12-24	00:20:00	28.841	In1	In
2021-12-24	00:25:00	28.841	In1	In
2021-12-24	00:30:00	28.841	In1	In
2021-12-24	00:35:00	28.841	In1	In
2021-12-24	08:30:00	28.841	In1	In
2021-12-24	08:35:00	28.841	In1	In
2021-12-24	08:40:00	28.841	In1	In
2021-12-24	08:45:00	28.841	In1	In
2021-12-24	08:50:00	28.841	In1	In
2021-12-24	08:55:00	28.841	In1	In
2021-12-24	09:00:00	28.841	In1	In
2021-12-24	09:05:00	28.841	In1	In
2021-12-24	09:10:00	28.841	In1	In
2021-12-24	09:15:00	28.841	In1	In
2021-12-24	09:20:00	28.841	In1	In
2021-12-24	17:55:00	28.841	In1	In
2021-12-24	18:00:00	28.841	In1	In
2021-12-24	18:05:00	28.841	In1	In
2021-12-24	18:10:00	28.841	In1	In
2021-12-24	18:15:00	28.841	In1	In
2021-12-24	00:00:00	28.866	In1	In
2021-12-24	00:05:00	28.866	In1	In
2021-12-24	00:10:00	28.866	In1	In
2021-12-24	00:15:00	28.866	In1	In
2021-12-24	09:30:00	28.866	In1	In
2021-12-24	17:45:00	28.866	In1	In
2021-12-24	17:50:00	28.866	In1	In
2021-12-24	09:35:00	28.891	In1	In
2021-12-24	09:45:00	28.891	In1	In
2021-12-24	10:15:00	28.891	In1	In
2021-12-24	10:20:00	28.891	In1	In
2021-12-24	17:20:00	28.891	In1	In
2021-12-24	17:25:00	28.891	In1	In
2021-12-24	17:30:00	28.891	In1	In
2021-12-24	17:35:00	28.891	In1	In
2021-12-24	17:40:00	28.891	In1	In
2021-12-24	09:40:00	28.916	In1	In
2021-12-24	09:50:00	28.916	In1	In
2021-12-24	09:55:00	28.916	In1	In
2021-12-24	10:05:00	28.916	In1	In
2021-12-24	10:10:00	28.916	In1	In
2021-12-24	17:05:00	28.916	In1	In
2021-12-24	17:10:00	28.916	In1	In
2021-12-24	17:15:00	28.916	In1	In
2021-12-24	10:00:00	28.941	In1	In
2021-12-24	16:50:00	28.941	In1	In
2021-12-24	16:55:00	28.941	In1	In
2021-12-24	17:00:00	28.941	In1	In
2021-12-24	10:25:00	28.965	In1	In
2021-12-24	10:40:00	28.965	In1	In
2021-12-24	10:55:00	28.965	In1	In
2021-12-24	11:00:00	28.965	In1	In
2021-12-24	14:25:00	28.965	In1	In
2021-12-24	14:30:00	28.965	In1	In
2021-12-24	14:50:00	28.965	In1	In
2021-12-24	14:55:00	28.965	In1	In
2021-12-24	16:35:00	28.965	In1	In
2021-12-24	16:40:00	28.965	In1	In
2021-12-24	16:45:00	28.965	In1	In
2021-12-24	10:45:00	28.99	In1	In
2021-12-24	10:50:00	28.99	In1	In
2021-12-24	11:05:00	28.99	In1	In
2021-12-24	11:10:00	28.99	In1	In
2021-12-24	14:45:00	28.99	In1	In
2021-12-24	15:10:00	28.99	In1	In
2021-12-24	15:15:00	28.99	In1	In
2021-12-24	15:50:00	28.99	In1	In
2021-12-24	15:55:00	28.99	In1	In
2021-12-24	16:20:00	28.99	In1	In
2021-12-24	16:30:00	28.99	In1	In
2021-12-24	10:35:00	29.015	In1	In
2021-12-24	11:15:00	29.015	In1	In
2021-12-24	14:20:00	29.015	In1	In
2021-12-24	14:35:00	29.015	In1	In
2021-12-24	15:00:00	29.015	In1	In
2021-12-24	15:05:00	29.015	In1	In
2021-12-24	15:20:00	29.015	In1	In
2021-12-24	15:45:00	29.015	In1	In
2021-12-24	16:00:00	29.015	In1	In
2021-12-24	16:05:00	29.015	In1	In
2021-12-24	16:15:00	29.015	In1	In
2021-12-24	16:25:00	29.015	In1	In
2021-12-24	11:20:00	29.04	In1	In
2021-12-24	11:25:00	29.04	In1	In
2021-12-24	14:05:00	29.04	In1	In
2021-12-24	14:40:00	29.04	In1	In
2021-12-24	15:40:00	29.04	In1	In
2021-12-24	16:10:00	29.04	In1	In
2021-12-24	10:30:00	29.065	In1	In
2021-12-24	13:25:00	29.065	In1	In
2021-12-24	14:10:00	29.065	In1	In
2021-12-24	15:25:00	29.065	In1	In
2021-12-24	15:30:00	29.065	In1	In
2021-12-24	15:35:00	29.065	In1	In
2021-12-24	11:30:00	29.09	In1	In
2021-12-24	13:30:00	29.09	In1	In
2021-12-24	14:00:00	29.09	In1	In
2021-12-24	14:15:00	29.09	In1	In
2021-12-24	13:20:00	29.115	In1	In
2021-12-24	11:35:00	29.14	In1	In
2021-12-24	11:45:00	29.14	In1	In
2021-12-24	11:50:00	29.14	In1	In
2021-12-24	13:15:00	29.14	In1	In
2021-12-24	13:55:00	29.14	In1	In
2021-12-24	11:40:00	29.165	In1	In
2021-12-24	11:55:00	29.165	In1	In
2021-12-24	12:00:00	29.165	In1	In
2021-12-24	12:45:00	29.165	In1	In
2021-12-24	13:00:00	29.165	In1	In
2021-12-24	13:05:00	29.165	In1	In
2021-12-24	13:35:00	29.165	In1	In
2021-12-24	13:40:00	29.165	In1	In
2021-12-24	13:50:00	29.165	In1	In
2021-12-24	12:15:00	29.19	In1	In
2021-12-24	13:10:00	29.19	In1	In
2021-12-24	13:45:00	29.19	In1	In
2021-12-24	12:10:00	29.215	In1	In
2021-12-24	12:05:00	29.24	In1	In
2021-12-24	12:20:00	29.24	In1	In
2021-12-24	12:25:00	29.24	In1	In
2021-12-24	12:30:00	29.24	In1	In
2021-12-24	12:35:00	29.24	In1	In
2021-12-24	12:40:00	29.24	In1	In
2021-12-24	12:55:00	29.24	In1	In
2021-12-24	12:50:00	29.265	In1	In
2021-12-23	04:45:00	28.245	In1	In
2021-12-23	04:50:00	28.245	In1	In
2021-12-23	04:55:00	28.245	In1	In
2021-12-23	05:00:00	28.245	In1	In
2021-12-23	05:05:00	28.245	In1	In
2021-12-23	05:10:00	28.245	In1	In
2021-12-23	05:15:00	28.245	In1	In
2021-12-23	05:20:00	28.245	In1	In
2021-12-23	04:25:00	28.27	In1	In
2021-12-23	04:30:00	28.27	In1	In
2021-12-23	04:35:00	28.27	In1	In
2021-12-23	04:40:00	28.27	In1	In
2021-12-23	05:25:00	28.27	In1	In
2021-12-23	05:30:00	28.27	In1	In
2021-12-23	04:05:00	28.295	In1	In
2021-12-23	04:10:00	28.295	In1	In
2021-12-23	04:15:00	28.295	In1	In
2021-12-23	04:20:00	28.295	In1	In
2021-12-23	05:35:00	28.295	In1	In
2021-12-23	03:55:00	28.32	In1	In
2021-12-23	04:00:00	28.32	In1	In
2021-12-23	05:40:00	28.32	In1	In
2021-12-23	05:45:00	28.32	In1	In
2021-12-23	03:45:00	28.345	In1	In
2021-12-23	03:50:00	28.345	In1	In
2021-12-23	05:50:00	28.345	In1	In
2021-12-23	03:30:00	28.369	In1	In
2021-12-23	03:35:00	28.369	In1	In
2021-12-23	03:40:00	28.369	In1	In
2021-12-23	05:55:00	28.369	In1	In
2021-12-23	03:20:00	28.394	In1	In
2021-12-23	03:25:00	28.394	In1	In
2021-12-23	06:00:00	28.394	In1	In
2021-12-23	06:05:00	28.394	In1	In
2021-12-23	03:10:00	28.419	In1	In
2021-12-23	03:15:00	28.419	In1	In
2021-12-23	06:10:00	28.419	In1	In
2021-12-23	02:55:00	28.444	In1	In
2021-12-23	03:00:00	28.444	In1	In
2021-12-23	03:05:00	28.444	In1	In
2021-12-23	06:15:00	28.444	In1	In
2021-12-23	02:50:00	28.468	In1	In
2021-12-23	06:20:00	28.468	In1	In
2021-12-23	02:35:00	28.493	In1	In
2021-12-23	02:40:00	28.493	In1	In
2021-12-23	02:45:00	28.493	In1	In
2021-12-23	06:25:00	28.493	In1	In
2021-12-23	02:25:00	28.518	In1	In
2021-12-23	02:30:00	28.518	In1	In
2021-12-23	06:30:00	28.518	In1	In
2021-12-23	02:15:00	28.543	In1	In
2021-12-23	02:20:00	28.543	In1	In
2021-12-23	02:05:00	28.568	In1	In
2021-12-23	02:10:00	28.568	In1	In
2021-12-23	06:35:00	28.568	In1	In
2021-12-23	01:55:00	28.593	In1	In
2021-12-23	02:00:00	28.593	In1	In
2021-12-23	06:40:00	28.593	In1	In
2021-12-23	01:50:00	28.617	In1	In
2021-12-23	06:45:00	28.617	In1	In
2021-12-23	06:50:00	28.617	In1	In
2021-12-23	01:35:00	28.642	In1	In
2021-12-23	01:40:00	28.642	In1	In
2021-12-23	01:45:00	28.642	In1	In
2021-12-23	06:55:00	28.642	In1	In
2021-12-23	07:00:00	28.642	In1	In
2021-12-23	01:10:00	28.667	In1	In
2021-12-23	01:15:00	28.667	In1	In
2021-12-23	01:20:00	28.667	In1	In
2021-12-23	01:25:00	28.667	In1	In
2021-12-23	01:30:00	28.667	In1	In
2021-12-23	07:05:00	28.667	In1	In
2021-12-23	07:10:00	28.667	In1	In
2021-12-23	00:40:00	28.692	In1	In
2021-12-23	00:45:00	28.692	In1	In
2021-12-23	00:50:00	28.692	In1	In
2021-12-23	00:55:00	28.692	In1	In
2021-12-23	01:00:00	28.692	In1	In
2021-12-23	01:05:00	28.692	In1	In
2021-12-23	07:15:00	28.692	In1	In
2021-12-23	07:20:00	28.692	In1	In
2021-12-23	00:30:00	28.717	In1	In
2021-12-23	00:35:00	28.717	In1	In
2021-12-23	07:25:00	28.717	In1	In
2021-12-23	07:30:00	28.717	In1	In
2021-12-23	07:35:00	28.717	In1	In
2021-12-23	07:40:00	28.717	In1	In
2021-12-23	00:20:00	28.742	In1	In
2021-12-23	00:25:00	28.742	In1	In
2021-12-23	00:10:00	28.766	In1	In
2021-12-23	00:15:00	28.766	In1	In
2021-12-23	07:45:00	28.766	In1	In
2021-12-23	00:00:00	28.791	In1	In
2021-12-23	00:05:00	28.791	In1	In
2021-12-23	07:50:00	28.791	In1	In
2021-12-23	07:55:00	28.816	In1	In
2021-12-23	08:00:00	28.841	In1	In
2021-12-23	08:05:00	28.866	In1	In
2021-12-23	21:50:00	28.866	In1	In
2021-12-23	21:55:00	28.866	In1	In
2021-12-23	22:00:00	28.866	In1	In
2021-12-23	22:10:00	28.866	In1	In
2021-12-23	22:15:00	28.866	In1	In
2021-12-23	22:20:00	28.866	In1	In
2021-12-23	22:25:00	28.866	In1	In
2021-12-23	22:30:00	28.866	In1	In
2021-12-23	22:35:00	28.866	In1	In
2021-12-23	23:50:00	28.866	In1	In
2021-12-23	23:55:00	28.866	In1	In
2021-12-23	08:10:00	28.891	In1	In
2021-12-23	21:25:00	28.891	In1	In
2021-12-23	21:30:00	28.891	In1	In
2021-12-23	21:35:00	28.891	In1	In
2021-12-23	21:40:00	28.891	In1	In
2021-12-23	21:45:00	28.891	In1	In
2021-12-23	22:05:00	28.891	In1	In
2021-12-23	22:40:00	28.891	In1	In
2021-12-23	22:45:00	28.891	In1	In
2021-12-23	22:50:00	28.891	In1	In
2021-12-23	22:55:00	28.891	In1	In
2021-12-23	23:00:00	28.891	In1	In
2021-12-23	23:05:00	28.891	In1	In
2021-12-23	23:10:00	28.891	In1	In
2021-12-23	23:15:00	28.891	In1	In
2021-12-23	23:20:00	28.891	In1	In
2021-12-23	23:25:00	28.891	In1	In
2021-12-23	23:30:00	28.891	In1	In
2021-12-23	23:35:00	28.891	In1	In
2021-12-23	23:40:00	28.891	In1	In
2021-12-23	23:45:00	28.891	In1	In
2021-12-23	20:45:00	28.916	In1	In
2021-12-23	20:50:00	28.916	In1	In
2021-12-23	20:55:00	28.916	In1	In
2021-12-23	21:00:00	28.916	In1	In
2021-12-23	21:05:00	28.916	In1	In
2021-12-23	21:10:00	28.916	In1	In
2021-12-23	21:15:00	28.916	In1	In
2021-12-23	21:20:00	28.916	In1	In
2021-12-23	08:15:00	28.941	In1	In
2021-12-23	17:50:00	28.941	In1	In
2021-12-23	17:55:00	28.941	In1	In
2021-12-23	18:00:00	28.941	In1	In
2021-12-23	18:05:00	28.941	In1	In
2021-12-23	18:10:00	28.941	In1	In
2021-12-23	18:15:00	28.941	In1	In
2021-12-23	18:20:00	28.941	In1	In
2021-12-23	18:25:00	28.941	In1	In
2021-12-23	18:30:00	28.941	In1	In
2021-12-23	18:35:00	28.941	In1	In
2021-12-23	18:40:00	28.941	In1	In
2021-12-23	18:45:00	28.941	In1	In
2021-12-23	18:50:00	28.941	In1	In
2021-12-23	18:55:00	28.941	In1	In
2021-12-23	19:00:00	28.941	In1	In
2021-12-23	19:05:00	28.941	In1	In
2021-12-23	19:10:00	28.941	In1	In
2021-12-23	19:15:00	28.941	In1	In
2021-12-23	19:20:00	28.941	In1	In
2021-12-23	19:25:00	28.941	In1	In
2021-12-23	19:30:00	28.941	In1	In
2021-12-23	19:35:00	28.941	In1	In
2021-12-23	19:40:00	28.941	In1	In
2021-12-23	19:45:00	28.941	In1	In
2021-12-23	19:50:00	28.941	In1	In
2021-12-23	19:55:00	28.941	In1	In
2021-12-23	20:00:00	28.941	In1	In
2021-12-23	20:05:00	28.941	In1	In
2021-12-23	20:10:00	28.941	In1	In
2021-12-23	20:15:00	28.941	In1	In
2021-12-23	20:20:00	28.941	In1	In
2021-12-23	20:25:00	28.941	In1	In
2021-12-23	20:30:00	28.941	In1	In
2021-12-23	20:35:00	28.941	In1	In
2021-12-23	20:40:00	28.941	In1	In
2021-12-23	08:20:00	28.965	In1	In
2021-12-23	17:40:00	28.965	In1	In
2021-12-23	17:45:00	28.965	In1	In
2021-12-23	08:25:00	28.99	In1	In
2021-12-23	17:30:00	28.99	In1	In
2021-12-23	17:35:00	28.99	In1	In
2021-12-23	08:30:00	29.015	In1	In
2021-12-23	17:20:00	29.015	In1	In
2021-12-23	17:25:00	29.015	In1	In
2021-12-23	17:10:00	29.04	In1	In
2021-12-23	17:15:00	29.04	In1	In
2021-12-23	08:35:00	29.065	In1	In
2021-12-23	17:05:00	29.065	In1	In
2021-12-23	08:40:00	29.09	In1	In
2021-12-23	17:00:00	29.09	In1	In
2021-12-23	08:45:00	29.115	In1	In
2021-12-23	16:55:00	29.115	In1	In
2021-12-23	08:50:00	29.14	In1	In
2021-12-23	08:55:00	29.14	In1	In
2021-12-23	16:50:00	29.14	In1	In
2021-12-23	16:45:00	29.165	In1	In
2021-12-23	09:00:00	29.19	In1	In
2021-12-23	09:40:00	29.19	In1	In
2021-12-23	09:45:00	29.19	In1	In
2021-12-23	16:40:00	29.19	In1	In
2021-12-23	09:05:00	29.215	In1	In
2021-12-23	16:35:00	29.215	In1	In
2021-12-23	09:10:00	29.24	In1	In
2021-12-23	09:15:00	29.24	In1	In
2021-12-23	10:20:00	29.24	In1	In
2021-12-23	12:10:00	29.24	In1	In
2021-12-23	16:30:00	29.24	In1	In
2021-12-23	09:20:00	29.265	In1	In
2021-12-23	09:25:00	29.265	In1	In
2021-12-23	09:35:00	29.265	In1	In
2021-12-23	10:15:00	29.265	In1	In
2021-12-23	12:35:00	29.265	In1	In
2021-12-23	16:25:00	29.265	In1	In
2021-12-23	09:30:00	29.29	In1	In
2021-12-23	09:50:00	29.29	In1	In
2021-12-23	10:00:00	29.29	In1	In
2021-12-23	12:05:00	29.29	In1	In
2021-12-23	12:15:00	29.29	In1	In
2021-12-23	16:20:00	29.29	In1	In
2021-12-23	09:55:00	29.315	In1	In
2021-12-23	10:05:00	29.315	In1	In
2021-12-23	12:00:00	29.315	In1	In
2021-12-23	12:20:00	29.315	In1	In
2021-12-23	12:30:00	29.315	In1	In
2021-12-23	16:15:00	29.315	In1	In
2021-12-23	10:10:00	29.34	In1	In
2021-12-23	10:25:00	29.34	In1	In
2021-12-23	10:50:00	29.34	In1	In
2021-12-23	11:50:00	29.34	In1	In
2021-12-23	12:25:00	29.34	In1	In
2021-12-23	12:40:00	29.34	In1	In
2021-12-23	16:05:00	29.34	In1	In
2021-12-23	16:10:00	29.34	In1	In
2021-12-23	10:45:00	29.365	In1	In
2021-12-23	10:55:00	29.365	In1	In
2021-12-23	11:00:00	29.365	In1	In
2021-12-23	11:05:00	29.365	In1	In
2021-12-23	11:35:00	29.365	In1	In
2021-12-23	11:55:00	29.365	In1	In
2021-12-23	16:00:00	29.365	In1	In
2021-12-23	10:30:00	29.389	In1	In
2021-12-23	11:10:00	29.389	In1	In
2021-12-23	11:15:00	29.389	In1	In
2021-12-23	11:20:00	29.389	In1	In
2021-12-23	15:55:00	29.389	In1	In
2021-12-23	10:35:00	29.414	In1	In
2021-12-23	11:25:00	29.414	In1	In
2021-12-23	11:30:00	29.414	In1	In
2021-12-23	15:50:00	29.414	In1	In
2021-12-23	10:40:00	29.439	In1	In
2021-12-23	11:40:00	29.439	In1	In
2021-12-23	12:45:00	29.439	In1	In
2021-12-23	13:10:00	29.439	In1	In
2021-12-23	13:15:00	29.439	In1	In
2021-12-23	11:45:00	29.464	In1	In
2021-12-23	12:50:00	29.464	In1	In
2021-12-23	15:40:00	29.464	In1	In
2021-12-23	15:45:00	29.464	In1	In
2021-12-23	12:55:00	29.49	In1	In
2021-12-23	13:00:00	29.49	In1	In
2021-12-23	13:20:00	29.515	In1	In
2021-12-23	13:05:00	29.54	In1	In
2021-12-23	15:25:00	29.54	In1	In
2021-12-23	15:35:00	29.54	In1	In
2021-12-23	14:45:00	29.565	In1	In
2021-12-23	14:50:00	29.565	In1	In
2021-12-23	13:25:00	29.59	In1	In
2021-12-23	15:20:00	29.59	In1	In
2021-12-23	15:30:00	29.59	In1	In
2021-12-23	13:30:00	29.615	In1	In
2021-12-23	14:00:00	29.615	In1	In
2021-12-23	14:55:00	29.615	In1	In
2021-12-23	15:05:00	29.615	In1	In
2021-12-23	15:10:00	29.615	In1	In
2021-12-23	15:15:00	29.615	In1	In
2021-12-23	13:35:00	29.64	In1	In
2021-12-23	13:40:00	29.64	In1	In
2021-12-23	15:00:00	29.64	In1	In
2021-12-23	13:45:00	29.665	In1	In
2021-12-23	14:05:00	29.665	In1	In
2021-12-23	14:30:00	29.665	In1	In
2021-12-23	13:50:00	29.69	In1	In
2021-12-23	13:55:00	29.69	In1	In
2021-12-23	14:10:00	29.69	In1	In
2021-12-23	14:20:00	29.69	In1	In
2021-12-23	14:35:00	29.69	In1	In
2021-12-23	14:40:00	29.69	In1	In
2021-12-23	14:15:00	29.715	In1	In
2021-12-23	14:25:00	29.715	In1	In
2021-12-22	03:30:00	28.518	In1	In
2021-12-22	03:35:00	28.518	In1	In
2021-12-22	03:40:00	28.518	In1	In
2021-12-22	03:45:00	28.518	In1	In
2021-12-22	03:50:00	28.518	In1	In
2021-12-22	03:55:00	28.518	In1	In
2021-12-22	04:00:00	28.518	In1	In
2021-12-22	03:15:00	28.543	In1	In
2021-12-22	03:20:00	28.543	In1	In
2021-12-22	03:25:00	28.543	In1	In
2021-12-22	04:05:00	28.543	In1	In
2021-12-22	04:10:00	28.543	In1	In
2021-12-22	04:15:00	28.543	In1	In
2021-12-22	04:20:00	28.543	In1	In
2021-12-22	04:25:00	28.543	In1	In
2021-12-22	04:30:00	28.543	In1	In
2021-12-22	03:00:00	28.568	In1	In
2021-12-22	03:05:00	28.568	In1	In
2021-12-22	03:10:00	28.568	In1	In
2021-12-22	04:35:00	28.568	In1	In
2021-12-22	04:40:00	28.568	In1	In
2021-12-22	02:40:00	28.593	In1	In
2021-12-22	02:45:00	28.593	In1	In
2021-12-22	02:50:00	28.593	In1	In
2021-12-22	02:55:00	28.593	In1	In
2021-12-22	04:45:00	28.593	In1	In
2021-12-22	04:50:00	28.593	In1	In
2021-12-22	02:25:00	28.617	In1	In
2021-12-22	02:30:00	28.617	In1	In
2021-12-22	02:35:00	28.617	In1	In
2021-12-22	04:55:00	28.617	In1	In
2021-12-22	05:00:00	28.617	In1	In
2021-12-22	02:10:00	28.642	In1	In
2021-12-22	02:15:00	28.642	In1	In
2021-12-22	02:20:00	28.642	In1	In
2021-12-22	05:05:00	28.642	In1	In
2021-12-22	05:10:00	28.642	In1	In
2021-12-22	05:15:00	28.642	In1	In
2021-12-22	05:20:00	28.642	In1	In
2021-12-22	02:00:00	28.667	In1	In
2021-12-22	02:05:00	28.667	In1	In
2021-12-22	05:25:00	28.667	In1	In
2021-12-22	05:30:00	28.667	In1	In
2021-12-22	05:35:00	28.667	In1	In
2021-12-22	01:40:00	28.692	In1	In
2021-12-22	01:45:00	28.692	In1	In
2021-12-22	01:50:00	28.692	In1	In
2021-12-22	01:55:00	28.692	In1	In
2021-12-22	05:40:00	28.692	In1	In
2021-12-22	05:45:00	28.692	In1	In
2021-12-22	05:50:00	28.692	In1	In
2021-12-22	01:20:00	28.717	In1	In
2021-12-22	01:25:00	28.717	In1	In
2021-12-22	01:30:00	28.717	In1	In
2021-12-22	01:35:00	28.717	In1	In
2021-12-22	05:55:00	28.717	In1	In
2021-12-22	06:00:00	28.717	In1	In
2021-12-22	06:05:00	28.717	In1	In
2021-12-22	06:10:00	28.717	In1	In
2021-12-22	01:00:00	28.742	In1	In
2021-12-22	01:05:00	28.742	In1	In
2021-12-22	01:10:00	28.742	In1	In
2021-12-22	01:15:00	28.742	In1	In
2021-12-22	06:15:00	28.742	In1	In
2021-12-22	06:20:00	28.742	In1	In
2021-12-22	00:20:00	28.766	In1	In
2021-12-22	00:25:00	28.766	In1	In
2021-12-22	00:30:00	28.766	In1	In
2021-12-22	00:35:00	28.766	In1	In
2021-12-22	00:40:00	28.766	In1	In
2021-12-22	00:45:00	28.766	In1	In
2021-12-22	00:50:00	28.766	In1	In
2021-12-22	00:55:00	28.766	In1	In
2021-12-22	06:25:00	28.766	In1	In
2021-12-22	06:30:00	28.766	In1	In
2021-12-22	00:00:00	28.791	In1	In
2021-12-22	00:05:00	28.791	In1	In
2021-12-22	00:10:00	28.791	In1	In
2021-12-22	00:15:00	28.791	In1	In
2021-12-22	06:35:00	28.791	In1	In
2021-12-22	06:40:00	28.791	In1	In
2021-12-22	23:55:00	28.791	In1	In
2021-12-22	06:45:00	28.816	In1	In
2021-12-22	06:50:00	28.816	In1	In
2021-12-22	23:05:00	28.816	In1	In
2021-12-22	23:10:00	28.816	In1	In
2021-12-22	23:15:00	28.816	In1	In
2021-12-22	23:20:00	28.816	In1	In
2021-12-22	23:25:00	28.816	In1	In
2021-12-22	23:30:00	28.816	In1	In
2021-12-22	23:35:00	28.816	In1	In
2021-12-22	23:40:00	28.816	In1	In
2021-12-22	23:45:00	28.816	In1	In
2021-12-22	23:50:00	28.816	In1	In
2021-12-22	06:55:00	28.841	In1	In
2021-12-22	07:00:00	28.841	In1	In
2021-12-22	07:05:00	28.841	In1	In
2021-12-22	22:50:00	28.841	In1	In
2021-12-22	22:55:00	28.841	In1	In
2021-12-22	23:00:00	28.841	In1	In
2021-12-22	07:10:00	28.866	In1	In
2021-12-22	07:15:00	28.866	In1	In
2021-12-22	07:20:00	28.866	In1	In
2021-12-22	07:25:00	28.866	In1	In
2021-12-22	07:30:00	28.866	In1	In
2021-12-22	07:35:00	28.866	In1	In
2021-12-22	07:55:00	28.866	In1	In
2021-12-22	08:00:00	28.866	In1	In
2021-12-22	08:05:00	28.866	In1	In
2021-12-22	21:50:00	28.866	In1	In
2021-12-22	21:55:00	28.866	In1	In
2021-12-22	22:00:00	28.866	In1	In
2021-12-22	22:05:00	28.866	In1	In
2021-12-22	22:10:00	28.866	In1	In
2021-12-22	22:15:00	28.866	In1	In
2021-12-22	22:20:00	28.866	In1	In
2021-12-22	22:25:00	28.866	In1	In
2021-12-22	22:30:00	28.866	In1	In
2021-12-22	22:35:00	28.866	In1	In
2021-12-22	22:40:00	28.866	In1	In
2021-12-22	22:45:00	28.866	In1	In
2021-12-22	07:40:00	28.891	In1	In
2021-12-22	07:45:00	28.891	In1	In
2021-12-22	07:50:00	28.891	In1	In
2021-12-22	08:10:00	28.891	In1	In
2021-12-22	18:55:00	28.891	In1	In
2021-12-22	19:00:00	28.891	In1	In
2021-12-22	19:05:00	28.891	In1	In
2021-12-22	19:10:00	28.891	In1	In
2021-12-22	19:15:00	28.891	In1	In
2021-12-22	19:20:00	28.891	In1	In
2021-12-22	19:25:00	28.891	In1	In
2021-12-22	19:45:00	28.891	In1	In
2021-12-22	19:50:00	28.891	In1	In
2021-12-22	19:55:00	28.891	In1	In
2021-12-22	20:00:00	28.891	In1	In
2021-12-22	20:05:00	28.891	In1	In
2021-12-22	20:10:00	28.891	In1	In
2021-12-22	20:15:00	28.891	In1	In
2021-12-22	20:20:00	28.891	In1	In
2021-12-22	20:25:00	28.891	In1	In
2021-12-22	20:30:00	28.891	In1	In
2021-12-22	20:35:00	28.891	In1	In
2021-12-22	20:40:00	28.891	In1	In
2021-12-22	20:45:00	28.891	In1	In
2021-12-22	20:50:00	28.891	In1	In
2021-12-22	20:55:00	28.891	In1	In
2021-12-22	21:00:00	28.891	In1	In
2021-12-22	21:05:00	28.891	In1	In
2021-12-22	21:10:00	28.891	In1	In
2021-12-22	21:15:00	28.891	In1	In
2021-12-22	21:20:00	28.891	In1	In
2021-12-22	21:25:00	28.891	In1	In
2021-12-22	21:30:00	28.891	In1	In
2021-12-22	21:35:00	28.891	In1	In
2021-12-22	21:40:00	28.891	In1	In
2021-12-22	21:45:00	28.891	In1	In
2021-12-22	08:15:00	28.916	In1	In
2021-12-22	18:35:00	28.916	In1	In
2021-12-22	18:40:00	28.916	In1	In
2021-12-22	18:45:00	28.916	In1	In
2021-12-22	18:50:00	28.916	In1	In
2021-12-22	19:30:00	28.916	In1	In
2021-12-22	19:35:00	28.916	In1	In
2021-12-22	19:40:00	28.916	In1	In
2021-12-22	18:10:00	28.941	In1	In
2021-12-22	18:15:00	28.941	In1	In
2021-12-22	18:20:00	28.941	In1	In
2021-12-22	18:25:00	28.941	In1	In
2021-12-22	18:30:00	28.941	In1	In
2021-12-22	08:20:00	28.965	In1	In
2021-12-22	18:00:00	28.965	In1	In
2021-12-22	18:05:00	28.965	In1	In
2021-12-22	08:25:00	28.99	In1	In
2021-12-22	17:55:00	28.99	In1	In
2021-12-22	08:30:00	29.015	In1	In
2021-12-22	17:50:00	29.015	In1	In
2021-12-22	17:40:00	29.04	In1	In
2021-12-22	17:45:00	29.04	In1	In
2021-12-22	08:35:00	29.065	In1	In
2021-12-22	17:35:00	29.065	In1	In
2021-12-22	08:55:00	29.09	In1	In
2021-12-22	17:05:00	29.09	In1	In
2021-12-22	17:10:00	29.09	In1	In
2021-12-22	17:15:00	29.09	In1	In
2021-12-22	17:20:00	29.09	In1	In
2021-12-22	17:25:00	29.09	In1	In
2021-12-22	17:30:00	29.09	In1	In
2021-12-22	08:40:00	29.115	In1	In
2021-12-22	08:45:00	29.115	In1	In
2021-12-22	08:50:00	29.115	In1	In
2021-12-22	09:00:00	29.115	In1	In
2021-12-22	16:30:00	29.115	In1	In
2021-12-22	16:35:00	29.115	In1	In
2021-12-22	16:40:00	29.115	In1	In
2021-12-22	16:45:00	29.115	In1	In
2021-12-22	16:50:00	29.115	In1	In
2021-12-22	16:55:00	29.115	In1	In
2021-12-22	17:00:00	29.115	In1	In
2021-12-22	16:15:00	29.14	In1	In
2021-12-22	16:20:00	29.14	In1	In
2021-12-22	16:25:00	29.14	In1	In
2021-12-22	09:05:00	29.165	In1	In
2021-12-22	09:10:00	29.19	In1	In
2021-12-22	16:10:00	29.19	In1	In
2021-12-22	16:05:00	29.215	In1	In
2021-12-22	09:15:00	29.24	In1	In
2021-12-22	16:00:00	29.24	In1	In
2021-12-22	15:50:00	29.265	In1	In
2021-12-22	15:55:00	29.265	In1	In
2021-12-22	09:20:00	29.29	In1	In
2021-12-22	09:25:00	29.29	In1	In
2021-12-22	09:30:00	29.29	In1	In
2021-12-22	09:55:00	29.29	In1	In
2021-12-22	15:45:00	29.29	In1	In
2021-12-22	09:35:00	29.315	In1	In
2021-12-22	09:40:00	29.34	In1	In
2021-12-22	09:45:00	29.34	In1	In
2021-12-22	09:50:00	29.34	In1	In
2021-12-22	10:20:00	29.34	In1	In
2021-12-22	10:35:00	29.34	In1	In
2021-12-22	15:30:00	29.34	In1	In
2021-12-22	15:40:00	29.34	In1	In
2021-12-22	10:00:00	29.365	In1	In
2021-12-22	10:30:00	29.365	In1	In
2021-12-22	15:25:00	29.365	In1	In
2021-12-22	10:05:00	29.389	In1	In
2021-12-22	10:15:00	29.389	In1	In
2021-12-22	15:35:00	29.389	In1	In
2021-12-22	10:25:00	29.414	In1	In
2021-12-22	10:40:00	29.414	In1	In
2021-12-22	15:20:00	29.414	In1	In
2021-12-22	10:10:00	29.439	In1	In
2021-12-22	10:45:00	29.439	In1	In
2021-12-22	10:50:00	29.439	In1	In
2021-12-22	10:55:00	29.439	In1	In
2021-12-22	15:05:00	29.439	In1	In
2021-12-22	15:10:00	29.439	In1	In
2021-12-22	15:15:00	29.439	In1	In
2021-12-22	11:20:00	29.464	In1	In
2021-12-22	11:25:00	29.464	In1	In
2021-12-22	11:15:00	29.49	In1	In
2021-12-22	11:35:00	29.49	In1	In
2021-12-22	14:45:00	29.49	In1	In
2021-12-22	11:10:00	29.515	In1	In
2021-12-22	14:20:00	29.515	In1	In
2021-12-22	14:50:00	29.515	In1	In
2021-12-22	15:00:00	29.515	In1	In
2021-12-22	11:30:00	29.54	In1	In
2021-12-22	12:40:00	29.54	In1	In
2021-12-22	13:35:00	29.54	In1	In
2021-12-22	14:15:00	29.54	In1	In
2021-12-22	14:40:00	29.54	In1	In
2021-12-22	14:55:00	29.54	In1	In
2021-12-22	11:00:00	29.565	In1	In
2021-12-22	11:05:00	29.565	In1	In
2021-12-22	12:35:00	29.565	In1	In
2021-12-22	11:40:00	29.59	In1	In
2021-12-22	12:05:00	29.59	In1	In
2021-12-22	12:10:00	29.59	In1	In
2021-12-22	12:15:00	29.59	In1	In
2021-12-22	14:25:00	29.59	In1	In
2021-12-22	11:45:00	29.615	In1	In
2021-12-22	11:50:00	29.615	In1	In
2021-12-22	12:00:00	29.615	In1	In
2021-12-22	12:50:00	29.615	In1	In
2021-12-22	13:05:00	29.615	In1	In
2021-12-22	14:10:00	29.615	In1	In
2021-12-22	14:30:00	29.615	In1	In
2021-12-22	11:55:00	29.64	In1	In
2021-12-22	12:30:00	29.64	In1	In
2021-12-22	12:45:00	29.64	In1	In
2021-12-22	13:20:00	29.64	In1	In
2021-12-22	13:40:00	29.64	In1	In
2021-12-22	14:35:00	29.64	In1	In
2021-12-22	12:20:00	29.665	In1	In
2021-12-22	12:55:00	29.665	In1	In
2021-12-22	13:00:00	29.665	In1	In
2021-12-22	13:10:00	29.665	In1	In
2021-12-22	13:15:00	29.665	In1	In
2021-12-22	13:25:00	29.665	In1	In
2021-12-22	13:30:00	29.665	In1	In
2021-12-22	13:50:00	29.665	In1	In
2021-12-22	14:00:00	29.665	In1	In
2021-12-22	14:05:00	29.665	In1	In
2021-12-22	13:45:00	29.69	In1	In
2021-12-22	13:55:00	29.69	In1	In
2021-12-22	12:25:00	29.715	In1	In
2021-12-21	03:20:00	28.369	In1	In
2021-12-21	03:25:00	28.369	In1	In
2021-12-21	03:30:00	28.369	In1	In
2021-12-21	03:35:00	28.369	In1	In
2021-12-21	02:55:00	28.394	In1	In
2021-12-21	03:00:00	28.394	In1	In
2021-12-21	03:05:00	28.394	In1	In
2021-12-21	03:10:00	28.394	In1	In
2021-12-21	03:15:00	28.394	In1	In
2021-12-21	03:40:00	28.394	In1	In
2021-12-21	02:50:00	28.419	In1	In
2021-12-21	03:45:00	28.419	In1	In
2021-12-21	02:45:00	28.444	In1	In
2021-12-21	03:50:00	28.444	In1	In
2021-12-21	02:40:00	28.468	In1	In
2021-12-21	03:55:00	28.468	In1	In
2021-12-21	02:35:00	28.493	In1	In
2021-12-21	04:00:00	28.493	In1	In
2021-12-21	02:30:00	28.518	In1	In
2021-12-21	04:05:00	28.518	In1	In
2021-12-21	02:25:00	28.543	In1	In
2021-12-21	04:10:00	28.543	In1	In
2021-12-21	04:15:00	28.543	In1	In
2021-12-21	02:05:00	28.568	In1	In
2021-12-21	02:10:00	28.568	In1	In
2021-12-21	02:15:00	28.568	In1	In
2021-12-21	02:20:00	28.568	In1	In
2021-12-21	04:20:00	28.568	In1	In
2021-12-21	01:55:00	28.593	In1	In
2021-12-21	02:00:00	28.593	In1	In
2021-12-21	04:25:00	28.593	In1	In
2021-12-21	04:30:00	28.593	In1	In
2021-12-21	04:35:00	28.593	In1	In
2021-12-21	04:40:00	28.593	In1	In
2021-12-21	04:45:00	28.593	In1	In
2021-12-21	04:50:00	28.593	In1	In
2021-12-21	04:55:00	28.593	In1	In
2021-12-21	05:05:00	28.593	In1	In
2021-12-21	05:10:00	28.593	In1	In
2021-12-21	05:15:00	28.593	In1	In
2021-12-21	01:30:00	28.617	In1	In
2021-12-21	01:40:00	28.617	In1	In
2021-12-21	01:45:00	28.617	In1	In
2021-12-21	01:50:00	28.617	In1	In
2021-12-21	05:00:00	28.617	In1	In
2021-12-21	05:20:00	28.617	In1	In
2021-12-21	05:25:00	28.617	In1	In
2021-12-21	01:00:00	28.642	In1	In
2021-12-21	01:05:00	28.642	In1	In
2021-12-21	01:10:00	28.642	In1	In
2021-12-21	01:15:00	28.642	In1	In
2021-12-21	01:20:00	28.642	In1	In
2021-12-21	01:25:00	28.642	In1	In
2021-12-21	01:35:00	28.642	In1	In
2021-12-21	05:30:00	28.642	In1	In
2021-12-21	05:35:00	28.642	In1	In
2021-12-21	00:45:00	28.667	In1	In
2021-12-21	00:50:00	28.667	In1	In
2021-12-21	00:55:00	28.667	In1	In
2021-12-21	05:40:00	28.667	In1	In
2021-12-21	00:30:00	28.692	In1	In
2021-12-21	00:35:00	28.692	In1	In
2021-12-21	00:40:00	28.692	In1	In
2021-12-21	05:45:00	28.692	In1	In
2021-12-21	05:50:00	28.692	In1	In
2021-12-21	05:55:00	28.692	In1	In
2021-12-21	06:00:00	28.692	In1	In
2021-12-21	06:05:00	28.692	In1	In
2021-12-21	06:10:00	28.692	In1	In
2021-12-21	06:15:00	28.692	In1	In
2021-12-21	06:20:00	28.692	In1	In
2021-12-21	06:25:00	28.692	In1	In
2021-12-21	06:30:00	28.692	In1	In
2021-12-21	06:35:00	28.692	In1	In
2021-12-21	00:00:00	28.717	In1	In
2021-12-21	00:05:00	28.717	In1	In
2021-12-21	00:10:00	28.717	In1	In
2021-12-21	00:15:00	28.717	In1	In
2021-12-21	00:20:00	28.717	In1	In
2021-12-21	00:25:00	28.717	In1	In
2021-12-21	06:40:00	28.717	In1	In
2021-12-21	06:45:00	28.717	In1	In
2021-12-21	06:50:00	28.742	In1	In
2021-12-21	06:55:00	28.766	In1	In
2021-12-21	07:00:00	28.766	In1	In
2021-12-21	07:05:00	28.766	In1	In
2021-12-21	07:10:00	28.766	In1	In
2021-12-21	07:15:00	28.791	In1	In
2021-12-21	07:20:00	28.791	In1	In
2021-12-21	07:25:00	28.816	In1	In
2021-12-21	23:50:00	28.816	In1	In
2021-12-21	23:55:00	28.816	In1	In
2021-12-21	07:30:00	28.841	In1	In
2021-12-21	23:40:00	28.841	In1	In
2021-12-21	23:45:00	28.841	In1	In
2021-12-21	07:35:00	28.866	In1	In
2021-12-21	07:40:00	28.866	In1	In
2021-12-21	07:45:00	28.866	In1	In
2021-12-21	23:25:00	28.866	In1	In
2021-12-21	23:30:00	28.866	In1	In
2021-12-21	23:35:00	28.866	In1	In
2021-12-21	07:50:00	28.891	In1	In
2021-12-21	07:55:00	28.891	In1	In
2021-12-21	21:45:00	28.891	In1	In
2021-12-21	22:35:00	28.891	In1	In
2021-12-21	22:40:00	28.891	In1	In
2021-12-21	22:45:00	28.891	In1	In
2021-12-21	22:50:00	28.891	In1	In
2021-12-21	22:55:00	28.891	In1	In
2021-12-21	23:00:00	28.891	In1	In
2021-12-21	23:05:00	28.891	In1	In
2021-12-21	23:10:00	28.891	In1	In
2021-12-21	23:15:00	28.891	In1	In
2021-12-21	23:20:00	28.891	In1	In
2021-12-21	08:00:00	28.916	In1	In
2021-12-21	21:15:00	28.916	In1	In
2021-12-21	21:20:00	28.916	In1	In
2021-12-21	21:25:00	28.916	In1	In
2021-12-21	21:30:00	28.916	In1	In
2021-12-21	21:35:00	28.916	In1	In
[truncated: 454,991+ more rows]

## Sheet: Monthly_Rain_Data
Day	Month	Rain.in	Rain.cm.
31	January	4.11	10.4394
28	February	1.01	2.5654
31	March	2.7	6.858
30	April	3.02	7.6708
31	May	7.14	18.1356
30	June	5.08	12.9032
31	July	8.76	22.2504
31	August	15.44	39.2176
30	September	11.61	29.4894
31	October	26.68	67.7672
30	November	9.87	25.0698
31	December	4.47	11.3538

## Sheet: Daily_Rain_Data
Month	Day	Precipitation
4	1	0.07
4	2	0.81
4	3	0
4	4	0
4	5	0.15
4	6	0.01
4	7	0.02
4	8	0
4	9	0
4	10	0.04
4	11	0
4	12	0.03
4	13	0.11
4	14	0.05
4	15	0
4	16	0
4	17	0.02
4	18	0
4	19	0.11
4	20	0.01
4	21	0
4	22	0
4	23	0
4	24	0
4	25	0
4	26	0
4	27	0
4	28	0
4	29	0
4	30	0
6	1	0.15
6	2	0
6	3	0.01
6	4	0.17
6	5	0.1
6	6	0.03
6	7	0.1
6	8	0
6	9	0
6	10	0
6	11	0
6	12	0
6	13	0
6	14	0
6	15	0
6	16	0
6	17	0
6	18	0.35
6	19	0.18
6	20	0.05
6	21	0.2
6	22	2.83
6	23	0.05
6	24	0.21
6	25	0.02
6	26	0
6	27	0.06
6	28	0.08
6	29	0.21
6	30	0.28
9	1	0.12
9	2	0.39
9	3	0.2
9	4	0.68
9	5	0.14
9	6	0.06
9	7	0.08
9	8	0.36
9	9	0
9	10	0.03
9	11	0.5
9	12	0.06
9	13	0.03
9	14	0.33
9	15	0.57
9	16	0.07
9	17	0.1
9	18	0
9	19	0
9	20	0
9	21	0
9	22	1.3
9	23	3.97
9	24	1.41
9	25	0.71
9	26	0
9	27	0
9	28	0
9	29	0
9	30	0.5
12	1	2.66
12	2	0.1
12	3	0
12	4	0
12	5	0.37
12	6	0
12	7	0.34
12	8	0
12	9	0.14
12	10	0
12	11	0
12	12	0.05
12	13	0.09
12	14	0.02
12	15	0.01
12	16	0.11
12	17	0.11
12	18	0.09
12	19	0.06
12	20	0.01
12	21	0.07
12	22	0.01
12	23	0
12	24	0.21
12	25	0
12	26	0
12	27	0.01
12	28	0
12	29	0
12	30	0.01
12	31	0

## Sheet: Water-FIB
In.Out	Site	Date	Total.Coliform	E.coli	Enterococcus	Nitrate/Nitrite (NO3/NO2-N) (mg/L as N)	Ortho-Phosphate (PO4-P) (mg/L as P)
IN	IN1	2021-04-24	2419.6	866.4	11.2	< 0.010	< 0.010
IN	IN2	2021-04-24	2419.6	770.1	5.1	< 0.010	< 0.010
IN	IN3	2021-04-24	2419.6	547.5	2	< 0.010	< 0.010
OUT	OUT1	2021-04-24	2419.6	920.8	8.3	< 0.010	< 0.010
OUT	OUT2	2021-04-24	2419.6	292.4	1	< 0.010	< 0.010
OUT	OUT3	2021-04-24	2419.6	547.5	1	< 0.010	< 0.010
IN	IN1	2021-07-01	959	30	8.5	< 0.010	< 0.010
IN	IN2	2021-07-01	798	107	26.2	< 0.010	< 0.010
IN	IN3	2021-07-01	738	131	9.7	< 0.010	< 0.010
OUT	OUT1	2021-07-01	860	250	14.5	< 0.010	< 0.010
OUT	OUT2	2021-07-01	1483	145	29.9	< 0.010	< 0.010
OUT	OUT3	2021-07-01	1046	135	46.4	< 0.010	< 0.010
IN	IN1	2021-09-21	5172	687	31.5	< 0.010	< 0.010
IN	IN2	2021-09-21	4106	567	29.5	< 0.010	< 0.010
IN	IN3	2021-09-21	5794	757	13.5	< 0.010	< 0.010
OUT	OUT1	2021-09-21	3255	675	17.1	< 0.010	< 0.010
OUT	OUT2	2021-09-21	789	336	7.5	< 0.010	< 0.010
OUT	OUT3	2021-09-21	1658	408	2	< 0.010	< 0.010
IN	IN1	2021-12-28	2098	631	9.3	< 0.010	< 0.010
IN	IN2	2021-12-28	1722	496	13.7	NA	NA
IN	IN3	2021-12-28	2382	529	35	< 0.010	< 0.010
OUT	OUT1	2021-12-28	2282	717	55.8	< 0.010	< 0.010
OUT	OUT2	2021-12-28	1777	106	26.9	< 0.010	< 0.010
OUT	OUT3	2021-12-28	1483	341	28.4	< 0.010	< 0.010
